# Supplementary material
Source: PubMed Central journal article supplement (PMC7233454)

## ONLINE SUPPLEMENT

### Association of Blood Pressure with Outcomes in Acute Stroke Thrombectomy

*Short title:* BP and Outcomes in MT-Treated Strokes

Konark Malhotra, MD<sup>1</sup>; Nitin Goyal, MD<sup>2</sup>; Aristeidis H. Katsanos, MD<sup>3</sup>; Angeliki Filippatou, MD<sup>4</sup>; Eva A. Mistry, MBBS<sup>5</sup>; Pooja Khatri, MD<sup>6</sup>; Mohammad Anadani, MD<sup>7,8</sup>; Alejandro M. Spiotta, MD<sup>8</sup>; Else Charlotte Sandset, MD<sup>9,10</sup>; Amrou Sarraj, MD<sup>11</sup>; Georgios Magoufis, MD<sup>12</sup>; Christos Krogias, MD<sup>13</sup>; Lars Tönges, MD<sup>13</sup>; Apostolos Sfouris, MD<sup>12</sup>; Lucas Eliyovich, MD<sup>14</sup>; Mayank Goyal, MD<sup>15</sup>; Adam Arthur, MD, MPH<sup>14</sup>; Andrei V. Alexandrov, MD<sup>2</sup>; Georgios Tsivgoulis, MD<sup>2,4</sup>

<sup>1</sup>Department of Neurology, Allegheny Health Network, Pittsburgh, Pennsylvania, USA

<sup>2</sup>Department of Neurology, University of Tennessee, Memphis, Tennessee, USA

<sup>3</sup> Department of Neurology, McMaster University/Population Health Research Institute, Hamilton, Canada

<sup>4</sup>Second Department of Neurology, “Attikon” University Hospital, National and Kapodistrian University of Athens, Athens, Greece

<sup>5</sup>Department of Neurology, Vanderbilt University, Nashville, Tennessee, USA

<sup>6</sup>Department of Neurology, University of Cincinnati, Cincinnati, Ohio, USA

<sup>7</sup>Department of Neurology, Washington University School of Medicine, St Louis, Missouri, USA

<sup>8</sup>Department of Neurosurgery, Medical University of South Carolina, Charleston, South Carolina, USA

<sup>9</sup>Department of Neurology, Stroke Unit, Oslo University Hospital, Oslo, Norway

<sup>10</sup>The Norwegian Air Ambulance Foundation, Oslo, Norway

<sup>11</sup> Department of Neurology, UT Houston, Houston, Texas, USA

<sup>12</sup> Stroke Unit, Metropolitan Hospital, Piraeus, Greece

<sup>13</sup> Department of Neurology, St. Josef-Hospital, Ruhr-University Bochum, Bochum, Germany

<sup>14</sup> Department of Neurosurgery, University of Tennessee/Semmes-Murphey Clinic, Memphis, Tennessee, USA

<sup>15</sup> Departments of Radiology and Clinical Neurosciences, University of Calgary, Calgary, Alberta, Canada.

*Correspondence:* Konark Malhotra, MD

Staff, Department of Neurology

Allegheny Health Network, Pittsburgh, PA, USA

Tel: +1-412-359-8841

Fax: +1-412-442-2115

E-mail: [konark.malhotra@yahoo.com](mailto:konark.malhotra@yahoo.com)

## **Supplemental Methods**

### **Complete search algorithm used in MEDLINE search**

((mechanical[All Fields] AND ("thrombectomy"[MeSH Terms] OR "thrombectomy"[All Fields])) OR (endovascular[All Fields] AND (((("ischemia"[MeSH Terms] OR "ischemia"[All Fields] OR "ischemic"[All Fields]) AND ("stroke"[MeSH Terms] OR "stroke"[All Fields])) OR (large[All Fields] AND ("blood vessels"[MeSH Terms] OR ("blood"[All Fields] AND "vessels"[All Fields]) OR "blood vessels"[All Fields] OR "vessel"[All Fields]) AND ("vessel occlusion"[MeSH Terms] OR ("vessel"[All Fields] AND "occlusion"[All Fields]) OR "vessel occlusion"[All Fields] OR "occlusion"[All Fields])) OR ("brain ischemia"[MeSH Terms] OR ("brain"[All Fields] AND "ischemia"[All Fields]) OR "brain ischemia"[All Fields] OR ("cerebrovascular"[All Fields] AND "ischemia"[All Fields]) OR "cerebrovascular ischemia"[All Fields]) OR ("stroke"[MeSH Terms] OR "stroke"[All Fields])) AND ("blood pressure") OR blood pressure [MeSH Terms] OR ("systolic") OR pressure, systolic [MeSH Terms] OR ("diastolic") OR pressure, diastolic [MeSH Terms]))

## Supplementary References

1. Lowhagen Henden P, Rentzos A, Karlsson JE, Rosengren L, Sundeman H, Reinsfelt B, Ricksten SE. Hypotension during endovascular treatment of ischemic stroke is a risk factor for poor neurological outcome. *Stroke*. 2015;46:2678-2680
2. Mulder M, Ergezen S, Lingsma HF, Berkhemer OA, Fransen PSS, Beumer D, van den Berg LA, Lycklama ANG, Emmer BJ, van der Worp HB, Nederkoorn PJ, Roos Y, van Oostenbrugge RJ, van Zwam WH, Majoie C, van der Lugt A, Dippel DWJ. Baseline blood pressure effect on the benefit and safety of intra-arterial treatment in mr clean (multicenter randomized clinical trial of endovascular treatment of acute ischemic stroke in the netherlands). *Stroke*. 2017;48:1869-1876
3. Mundiyanapurath S, Stehr A, Wolf M, Kieser M, Mohlenbruch M, Bendszus M, Hacke W, Bosel J. Pulmonary and circulatory parameter guided anesthesia in patients with ischemic stroke undergoing endovascular recanalization. *Journal of neurointerventional surgery*. 2016;8:335-341
4. Pikija S, Trkulja V, Ramesmayer C, Mutzenbach JS, Killer-Oberpfalzer M, Hecker C, Bubel N, Fussel MU, Sellner J. Higher blood pressure during endovascular thrombectomy in anterior circulation stroke is associated with better outcomes. *Journal of stroke*. 2018;20:373-384
5. Treurniet KM, Berkhemer OA, Immink RV, Lingsma HF, Ward-van der Stam VMC, Hollmann MW, Vuyk J, van Zwam WH, van der Lugt A, van Oostenbrugge RJ, Dippel DWJ, Coutinho JM, Roos Y, Marquering HA, Majoie C. A decrease in blood pressure is associated with unfavorable outcome in patients undergoing thrombectomy under general anesthesia. *Journal of neurointerventional surgery*. 2018;10:107-111
6. Eker OF, Saver JL, Goyal M, Jahan R, Levy EI, Nogueira RG, Yavagal DR, Bonafe A. Impact of anesthetic management on safety and outcomes following mechanical thrombectomy for ischemic stroke in swift prime cohort. *Frontiers in neurology*. 2018;9:702
7. Alcaraz G, Chui J, Schaafsma J, Manninen P, Porta-Sanchez A, Pereira VM, Venkatraghavan L. Hemodynamic management of patients during endovascular treatment of acute ischemic stroke under conscious sedation: A retrospective cohort study. *Journal of neurosurgical anesthesiology*. 2019;31:299-305
8. Zhang YB, Su YY, He YB, Liu YF, Liu G, Fan LL. Early neurological deterioration after recanalization treatment in patients with acute ischemic stroke: A retrospective study. *Chinese medical journal*. 2018;131:137-143
9. Takahashi CE, Brambrink AM, Aziz MF, Macri E, Raines J, Multani-Kohol A, Hinson HE, Lutsep HL, Clark WM, Fields JD. Association of intraprocedural blood pressure and end tidal carbon dioxide with outcome after acute stroke intervention. *Neurocrit Care*. 2014;20:202-208
10. Sivasankar C, Stiefel M, Miano TA, Kositratna G, Yandrawattana S, Hurst R, Kofke WA. Anesthetic variation and potential impact of anesthetics used during endovascular management of acute ischemic stroke. *Journal of neurointerventional surgery*. 2016;8:1101-1106
11. Athiraman U, Sultan-Qurraie A, Nair B, Tirschwell DL, Ghodke B, Havenon AD, Hallam DK, Kim LJ, Becker KJ, Sharma D. Endovascular treatment of acute ischemic stroke under general anesthesia: Predictors of good outcome. *Journal of neurosurgical anesthesiology*. 2018;30:223-230
12. Whalin MK, Halenda KM, Haussen DC, Rebello LC, Frankel MR, Gershon RY, Nogueira RG. Even small decreases in blood pressure during conscious sedation affect clinical outcome after stroke thrombectomy: An analysis of hemodynamic thresholds. *AJNR. American journal of neuroradiology*. 2017;38:294-298
13. Jumaa MA, Zhang F, Ruiz-Ares G, Gelzinis T, Malik AM, Aleu A, Oakley JI, Jankowitz B, Lin R, Reddy V, Zaidi SF, Hammer MD, Wechsler LR, Horowitz M, Jovin TG. Comparison of safety and clinical and radiographic outcomes in endovascular acute stroke therapy for

- proximal middle cerebral artery occlusion with intubation and general anesthesia versus the nonintubated state. *Stroke*. 2010;41:1180-1184
14. Mattle HP, Kappeler L, Arnold M, Fischer U, Nedeltchev K, Remonda L, Jakob SM, Schroth G. Blood pressure and vessel recanalization in the first hours after ischemic stroke. *Stroke*. 2005;36:264-268
  15. Nogueira RG, Liebeskind DS, Sung G, Duckwiler G, Smith WS. Predictors of good clinical outcomes, mortality, and successful revascularization in patients with acute ischemic stroke undergoing thrombectomy: Pooled analysis of the mechanical embolus removal in cerebral ischemia (merci) and multi merci trials. *Stroke*. 2009;40:3777-3783
  16. Sweid A, Atallah E, Saad H, Bekelis K, Chalouhi N, Dang S, Li J, Kumar A, Turpin J, Barsoom R, Tjoumakaris S, Hasan D, DePrince M, Labella G, Rosenwasser RH, Jabbour P. Correlation between pre-admission blood pressure and outcome in a large telestroke cohort. *Journal of clinical neuroscience : official journal of the Neurosurgical Society of Australasia*. 2019;62:33-37
  17. de Havenon A, Bennett A, Stoddard GJ, Smith G, Wang H, Wold J, Chung L, Tirschwell DL, Majersik JJ. Increased blood pressure variability is associated with worse neurologic outcome in acute anterior circulation ischemic stroke. *Stroke research and treatment*. 2016;2016:7670161
  18. Anadani M, Orabi MY, Alawieh A, Goyal N, Alexandrov AV, Petersen N, Kodali S, Maier IL, Psychogios MN, Swisher CB, Inamullah O, Kansagra AP, Giles JA, Wolfe SQ, Singh J, Gory B, De Marini P, Kan P, Nascimento FA, Freire LI, Pandhi A, Mitchell H, Kim JT, Fargen KM, Al Kasab S, Liman J, Rahman S, Allen M, Richard S, Spiotta AM. Blood pressure and outcome after mechanical thrombectomy with successful revascularization. *Stroke*. 2019;Strokeaha118024687
  19. Abou-Chebl A, Zaidat OO, Castonguay AC, Gupta R, Sun CH, Martin CO, Holloway WE, Mueller-Kronast N, English JD, Linfante I, Dabus G, Malisch TW, Marden FA, Bozorgchami H, Xavier A, Rai AT, Froehler MT, Badruddin A, Nguyen TN, Taqi M, Abraham MG, Janardhan V, Shaltoni H, Novakovic R, Yoo AJ, Chen PR, Britz GW, Kaushal R, Nanda A, Issa MA, Nogueira RG. North american solitaire stent-retriever acute stroke registry: Choice of anesthesia and outcomes. *Stroke*. 2014;45:1396-1401
  20. Anadani M, Orabi Y, Alawieh A, Chatterjee A, Lena J, Al Kasab S, Spiotta AM. Blood pressure and outcome post mechanical thrombectomy. *Journal of clinical neuroscience : official journal of the Neurosurgical Society of Australasia*. 2019;62:94-99
  21. Bennett AE, Wilder MJ, McNally JS, Wold JJ, Stoddard GJ, Majersik JJ, Ansari S, de Havenon A. Increased blood pressure variability after endovascular thrombectomy for acute stroke is associated with worse clinical outcome. *Journal of neurointerventional surgery*. 2018;10:823-827
  22. Cernik D, Sanak D, Divisova P, Kocher M, Cihlar F, Zapletalova J, Veverka T, Prcuchova A, Ospalik D, Cerna M, Janousova P, Kral M, Dornak T, Prasil V, Franc D, Kanovsky P. Impact of blood pressure levels within first 24 hours after mechanical thrombectomy on clinical outcome in acute ischemic stroke patients. *Journal of neurointerventional surgery*. 2019;11:735-739
  23. Chang JY, Jeon SB, Lee JH, Kwon OK, Han MK. The relationship between blood pressure variability, recanalization degree, and clinical outcome in large vessel occlusive stroke after an intra-arterial thrombectomy. *Cerebrovascular diseases (Basel, Switzerland)*. 2018;46:279-286
  24. Chang JY, Jeon SB, Jung C, Gwak DS, Han MK. Postreperfusion blood pressure variability after endovascular thrombectomy affects outcomes in acute ischemic stroke patients with poor collateral circulation. *Frontiers in neurology*. 2019;10:346
  25. Cho BH, Kim JT, Lee JS, Park MS, Kang KW, Choi KH, Lee SH, Choi SM, Kim BC, Kim MK, Cho KH. Associations of various blood pressure parameters with functional outcomes

- after endovascular thrombectomy in acute ischaemic stroke. *European journal of neurology*. 2019;26:1019-1027
26. Ding X, Xu C, Zhong W, Gong X, Zhou Y, Chen Z, Lou M. Association of maximal systolic blood pressure with poor outcome in patients with hyperattenuated lesions on immediate nect after mechanical thrombectomy. *Journal of neurointerventional surgery*. 2019
  27. Goyal N, Tsivgoulis G, Pandhi A, Chang JJ, Dillard K, Ishfaq MF, Nearing K, Choudhri AF, Hoit D, Alexandrov AW, Arthur AS, Eljovich L, Alexandrov AV. Blood pressure levels post mechanical thrombectomy and outcomes in large vessel occlusion strokes. *Neurology*. 2017;89:540-547
  28. Goyal N, Tsivgoulis G, Iftikhar S, Khorchid Y, Fawad Ishfaq M, Doss VT, Zand R, Chang J, Alsherbini K, Choudhri A, Hoit D, Alexandrov AV, Arthur AS, Eljovich L. Admission systolic blood pressure and outcomes in large vessel occlusion strokes treated with endovascular treatment. *Journal of neurointerventional surgery*. 2017;9:451-454
  29. Goyal N, Tsivgoulis G, Pandhi A, Dillard K, Alsbrook D, Chang JJ, Krishnaiah B, Nickele C, Hoit D, Alsherbini K, Alexandrov AV, Arthur AS, Eljovich L. Blood pressure levels post mechanical thrombectomy and outcomes in non-recanalized large vessel occlusion patients. *Journal of neurointerventional surgery*. 2018;10:925-931
  30. Jagani M, Brinjikji W, Rabinstein AA, Pasternak JJ, Kallmes DF. Hemodynamics during anesthesia for intra-arterial therapy of acute ischemic stroke. *Journal of neurointerventional surgery*. 2016;8:883-888
  31. John S, Hazaa W, Uchino K, Toth G, Bain M, Thebo U, Hussain MS. Lower intraprocedural systolic blood pressure predicts good outcome in patients undergoing endovascular therapy for acute ischemic stroke. *Interventional neurology*. 2016;4:151-157
  32. John S, Hazaa W, Uchino K, Hussain MS. Timeline of blood pressure changes after intra-arterial therapy for acute ischemic stroke based on recanalization status. *Journal of neurointerventional surgery*. 2017;9:455-458
  33. Kim TJ, Park HK, Kim JM, Lee JS, Park SH, Jeong HB, Park KY, Rha JH, Yoon BW, Ko SB. Blood pressure variability and hemorrhagic transformation in patients with successful recanalization after endovascular recanalization therapy: A retrospective observational study. *Annals of neurology*. 2019;85:574-581
  34. Maier B, Gory B, Taylor G, Labreuche J, Blanc R, Obadia M, Abrivard M, Smajda S, Desilles JP, Redjem H, Ciccio G, Lukaszewicz AC, Turjman F, Riva R, Labeyrie PE, Duhamel A, Blacher J, Piotin M, Lapergue B, Mazighi M. Mortality and disability according to baseline blood pressure in acute ischemic stroke patients treated by thrombectomy: A collaborative pooled analysis. *Journal of the American Heart Association*. 2017;6(10):e006484;6
  35. Maier B, Turc G, Taylor G, Blanc R, Obadia M, Smajda S, Desilles JP, Redjem H, Ciccio G, Boisseau W, Sabben C, Ben Machaa M, Hamdani M, Leguen M, Gayat E, Blacher J, Lapergue B, Piotin M, Mazighi M. Prognostic significance of pulse pressure variability during mechanical thrombectomy in acute ischemic stroke patients. *Journal of the American Heart Association*. 2018;7:e009378
  36. Maier IL, Tsogkas I, Behme D, Bahr M, Knauth M, Psychogios MN, Liman J. High systolic blood pressure after successful endovascular treatment affects early functional outcome in acute ischemic stroke. *Cerebrovascular diseases (Basel, Switzerland)*. 2018;45:18-25
  37. McCarthy DJ, Ayodele M, Luther E, Sheinberg D, Bryant JP, Elwardany O, Kimball J, Starke RM. Prolonged heightened blood pressure following mechanical thrombectomy for acute stroke is associated with worse outcomes. *Neurocrit Care*. 2019;10.1007/s12028-019-00803-7.
  38. Mistry EA, Mistry AM, Nakawah MO, Khattar NK, Fortuny EM, Cruz AS, Froehler MT, Chitale RV, James RF, Fusco MR, Volpi JJ. Systolic blood pressure within 24 hours after thrombectomy for acute ischemic stroke correlates with outcome. *Journal of the American Heart Association*. 2017;6(5):e006167;6

39. Panni P, Gory B, Xie Y, Consoli A, Desilles JP, Mazighi M, Labreuche J, Piotin M, Turjman F, Eker OF, Bracard S, Anxionnat R, Richard S, Hossu G, Blanc R, Lapergue B. Acute stroke with large ischemic core treated by thrombectomy. *Stroke*. 2019;50:1164-1171
40. Petersen NH, Ortega-Gutierrez S, Wang A, Lopez GV, Strander S, Kodali S, Silverman A, Zheng-Lin B, Dandapat S, Sansing LH, Schindler JL, Falcone GJ, Gilmore EJ, Amin H, Cord B, Hebert RM, Matouk C, Sheth KN. Decreases in blood pressure during thrombectomy are associated with larger infarct volumes and worse functional outcome. *Stroke*. 2019;50:1797-1804
41. Rasmussen M, Espelund US, Juul N, Yoo AJ, Sorensen LH, Sorensen KE, Johnsen SP, Andersen G, Simonsen CZ. The influence of blood pressure management on neurological outcome in endovascular therapy for acute ischaemic stroke. *British journal of anaesthesia*. 2018;120:1287-1294
42. Schonemberger S, Uhlmann L, Ungerer M, Pfaff J, Nagel S, Klose C, Bendszus M, Wick W, Ringleb PA, Kieser M, Mohlenbruch MA, Bosel J. Association of blood pressure with short- and long-term functional outcome after stroke thrombectomy: Post hoc analysis of the siesta trial. *Stroke*. 2018;49:1451-1456
43. Whalin MK, Lopian S, Wyatt K, Sun CH, Nogueira RG, Glenn BA, Gershon RY, Gupta R. Dexmedetomidine: A safe alternative to general anesthesia for endovascular stroke treatment. *Journal of neurointerventional surgery*. 2014;6:270-275

## **Supplemental Tables**

**Table S1.** Definitions of symptomatic intracranial hemorrhage utilized by included studies

| Adjudicating study | Definition                                                                                                                                                                                                                                                                                                              |
|--------------------|-------------------------------------------------------------------------------------------------------------------------------------------------------------------------------------------------------------------------------------------------------------------------------------------------------------------------|
| NINDS              | Any ICH that had not been seen on a previous CT scan but there was subsequently either a suspicion of hemorrhage or any decline in neurologic status. To detect intracranial hemorrhage, CT scans were required at 24 hours and 7 to 10 days after the onset of stroke and when clinical findings suggested hemorrhage. |
| ECASS 2            | Any ICH with neurological deterioration ( $\geq 4$ points increase on the NIHSS) from baseline or death within 22 to 36 hours. Establishment of a causal relationship between the hemorrhage and clinical deterioration or death was not a requirement.                                                                 |
| ECASS 3            | In addition to definition of ECASS 2, the hemorrhage must have been identified as the predominant cause of the neurologic deterioration.                                                                                                                                                                                |
| SITS-MOST          | Large or remote parenchymal ICH (type 2, defined as greater than 30% of the infarct area affected by hemorrhage with mass effect or extension outside the infarct) combined with neurological deterioration ( $\geq 4$ points increase on the NIHSS) from baseline or death within 22 to 36 hours.                      |

NINDS, National Institute of Neurological Disorders and Stroke; ICH, intracranial hemorrhage; CT, computed tomography; ECASS, European Cooperative Acute Stroke Study; NIHSS, National Institutes of Health Stroke Scale; SITS-MOST, Safe Implementation of Thrombolysis in Stroke-Monitoring Study.



**Table S2.** Excluded studies with reasons for exclusion

| Study                                    | Reason for exclusion                                                |
|------------------------------------------|---------------------------------------------------------------------|
| Lowhagen et al, 2015 <sup>1</sup>        | Data available for MAP; No SBP/DBP data available                   |
| Mulder et al, 2017 <sup>2</sup>          | Dichotomous SBP available; No continuous SBP/DBP available          |
| Mundiyanapurath et al, 2016 <sup>3</sup> | SBP available in median (IQR); No mean or maximum SBP/DBP available |
| Pikija et al, 2018 <sup>4</sup>          | SBP available in median (IQR); No mean or maximum SBP/DBP available |
| Treurniet et al, 2018 <sup>5</sup>       | Data available for MAP; No SBP/DBP data available                   |
| Eker et al, 2018 <sup>6</sup>            | No mean or maximum SBP/DBP available                                |
| Alcaraz et al, 2019 <sup>7</sup>         | Dichotomous SBP available; No continuous SBP/DBP available          |
| Zhang et al, 2018 <sup>8</sup>           | Dichotomous SBP available; No continuous SBP/DBP available          |
| Takahashi et al, 2014 <sup>9</sup>       | Dichotomous SBP available; No continuous SBP/DBP available          |
| Sivasankar et al, 2016 <sup>10</sup>     | Data available for MAP; No SBP/DBP data available                   |
| Athiraman et al, 2018 <sup>11</sup>      | Dichotomous SBP available; No continuous SBP/DBP available          |
| Whalin et al, 2017 <sup>12</sup>         | No continuous SBP/DBP available                                     |
| Jumaa et al, 2010 <sup>13</sup>          | No intended outcome data (i.e. mortality/FI, sICH) reported         |
| Mattle et al, 2005 <sup>14</sup>         | Endovascular treatment other than MT                                |
| Nogueira et al, 2009 <sup>15</sup>       | Endovascular treatment other than MT                                |
| Sweid et al, 2019 <sup>16</sup>          | Endovascular treatment other than MT                                |
| De Havenon et al, 2016 <sup>17</sup>     | Endovascular treatment other than MT                                |
| Anadani et al, 2019 <sup>18</sup>        | Providing overlapping data                                          |

**Table S3.** Overview on the characteristics of the included studies

(1) functional independence (mRS 0–2), (2) sICH, (3) mortality, (4) recanalization, (5) mRS shift

| First author, Year                      | Study design, registry | N Total | BP monitoring              | sICH definition | Mean/Median age | Median NIHSS | Female sex (%) | IV tPA (%) | Adjusted variables                                                                                                              | Outcomes                |
|-----------------------------------------|------------------------|---------|----------------------------|-----------------|-----------------|--------------|----------------|------------|---------------------------------------------------------------------------------------------------------------------------------|-------------------------|
| Abou-Chebl, 2014 <sup>19</sup>          | Retrospective, NASA    | 281     | Admission                  | -               | 68              | 18           | 48             | 45         | Age, NIHSS, revascularization, and time from onset                                                                              | 1, 3*                   |
| Anadani, 2019 <sup>20</sup>             | Retrospective          | 298     | Admission, 24 hr after MT  | ECASS           | 67              | 15           | 51             | 42         | Age, sex, race, diabetes, HTN, AF, HLD, onset to groin, NIHSS, IVT, procedure time, TICI score complications, ASPECTS           | 1 <sup>†</sup><br>1, 2* |
| Bennett, 2018 <sup>21</sup>             | Retrospective          | 182     | 24 hr after MT             | -               | 63              | 16           | 51             | 47         | Age, NIHSS, AF, HLD, sICH, TICI score, admission INR and BUN, anterior circulation stroke, and history of prior clinical stroke | 5*                      |
| Cernik, 2019 <sup>22</sup>              | Retrospective          | 690     | 24 hr after MT             | SITS-MOST       | 71              | 17           | 49             | 75         | Age, HTN, DM, AF, NIHSS, IVT, admission glucose, recanalization time, sICH                                                      | 1 <sup>†</sup><br>1*    |
| Chang, 2019 <sup>23</sup>               | Retrospective          | 303     | 24 hr after MT             | -               | 72              | 15           | 45             | 39         | Age, male, BMI, NIHSS, HTN, DM, smoking, TICI                                                                                   | 1, 4 <sup>†</sup><br>1* |
| Chang (recanalized), 2019 <sup>24</sup> | Retrospective          | 90      | Admission, 24 hr after IVT | ECASS 2         | 72              | 15           | 40             | -          | Age, sex, NIHSS, occlusion site                                                                                                 | 1 <sup>†</sup>          |

BP, blood pressure; sICH, symptomatic intracranial hemorrhage; IVT, intravenous thrombolysis; MT, mechanical thrombectomy; IAT, intra-arterial treatment; SITS-MOST, Safe Implementation of Thrombolysis in Stroke-Monitoring Study; ECASS, European Cooperative Acute Stroke Study; ASPECTS,

|                                                      |               |     |                            |           |    |    |    |    |                                                                                                                                                                                                                                        |                                        |
|------------------------------------------------------|---------------|-----|----------------------------|-----------|----|----|----|----|----------------------------------------------------------------------------------------------------------------------------------------------------------------------------------------------------------------------------------------|----------------------------------------|
| Cho, 2019 <sup>25</sup>                              | Retrospective | 378 | Admission, 24 hr after IVT | SITS-MOST | 70 | 12 | 46 | 58 | Age, gender, baseline NIHSS, vascular risk factors, SBP                                                                                                                                                                                | 1, 2, 3, 4 <sup>†</sup><br>1, 2, 3, 5* |
| Ding, 2019 <sup>26</sup>                             | Retrospective | 148 | Admission, 24 hr after MT  | ECASS 2   | 69 | 14 | 43 | -  | Age, NIHSS, HTN, previous antiplatelet usage, ASPECTS, and PH                                                                                                                                                                          | 1, 2 <sup>†</sup><br>1, 2*             |
| Goyal (post-MT, recanalized), 2017 <sup>27</sup>     | Retrospective | 217 | 24 hr after MT             | SITS-MOST | 62 | 16 | 50 | 65 | Age, sex, race, HTN, DM, HLD, AF, smoking, admission SBP/DBP levels, NIHSS, admission serum glucose, IVT, ASPECTS, onset to groin puncture time, complete reperfusion                                                                  | 1, 2, 3 <sup>†</sup><br>1, 3, 5*       |
| Goyal (pre-MT), 2017 <sup>28</sup>                   | Retrospective | 116 | Admission                  | SITS-MOST | 63 | 17 | 49 | 65 | Age, sex, race, vascular risk factors, admission DBP, admission NIHSS and serum blood glucose, IVT, onset to groin time, collateral score and successful revascularization                                                             | 1, 2, 3, 4 <sup>†</sup><br>1*          |
| Goyal (post-MT, non-recanalized), 2018 <sup>29</sup> | Retrospective | 88  | 24 hr after IVT            | SITS-MOST | 62 | 16 | 52 | 64 | age, gender, race, HTN, DM, HLD, AF, CAD, CHF, current smoking, admission SBP/DBP levels, NIHSS, admission serum glucose and LDL levels, IVT, ASPECTS, onset to groin puncture time, type of anesthesia, brain edema, good collaterals | 1, 2, 3 <sup>†</sup><br>1, 3, 5*       |
| Jagani, 2016 <sup>30</sup>                           | Retrospective | 99  | During MT                  | -         | 66 | 17 | 24 | 25 | Preoperative SBP and DBP, age, DM, morbid obesity, location of vessel occlusion, NIHSS                                                                                                                                                 | 1 <sup>†</sup>                         |
| John, 2016 <sup>31</sup>                             | Retrospective | 147 | During MT                  | -         | 67 | 16 | 55 | 36 | age, sex, anesthesia type, maximum SBP, initial NIHSS, IVT, ASPECTS, ICA terminus occlusion, successful recanalization, time to recanalization, and sICH                                                                               | 1 <sup>†</sup><br>1*                   |

|                              |                     |      |                 |           |    |    |    |    |                                                                                                                       |                               |
|------------------------------|---------------------|------|-----------------|-----------|----|----|----|----|-----------------------------------------------------------------------------------------------------------------------|-------------------------------|
| John, 2017 <sup>32</sup>     | Retrospective       | 62   | 24 hr after MT  | -         | 69 | 15 | 60 | 39 | -                                                                                                                     | 4 <sup>†</sup>                |
| Kim, 2019 <sup>33</sup>      | Retrospective       | 211  | 24 hr after MT  | SITS-MOST | 67 | 16 | 43 | 54 | Age, NIHSS, fasting glucose level, GFR, platelets, and lesion location                                                | 2 <sup>†</sup><br>2*          |
| Maier B, 2017 <sup>34</sup>  | Retrospective, ETIS | 1332 | Admission       | ECASS 2   | 68 | 16 | 48 | 63 | Age, sex, HTN, DM, NIHSS, and prior use of thrombolysis                                                               | 1, 2, 3 <sup>†</sup><br>1, 3* |
| Maier B, 2018 <sup>35</sup>  | Retrospective, ETIS | 343  | During MT       | ECASS 2   | 67 | 16 | 48 | 64 | Age, HTN, DM, pre-stroke mRS, NIHSS, general anesthesia, recanalization, IVT                                          | 1, 2, 3, 5*                   |
| Maier IL, 2018 <sup>36</sup> | Retrospective       | 168  | 24 hr after MT  | -         | 74 | 15 | 43 | 71 | Age, HTN, CKD, NIHSS, baseline mRS, ASPECTS, collateral score, IVT, ICH, hospital days, onset-to-reperfusion,         | 1 <sup>†</sup><br>1*          |
| McCarthy, 2019 <sup>37</sup> | Retrospective       | 212  | 24 hr. after MT | ECASS 2   | 71 | 17 | 49 | 53 | Age, recanalization success, various comorbidities, baseline NIHSS, hemorrhagic conversion, onset to reperfusion time | 1, 3 <sup>†</sup><br>1, 2, 3* |
| Mistry, 2017 <sup>38</sup>   | Retrospective       | 228  | 24 hr after MT  | SITS-MOST | 66 | 16 | 54 | 52 | Age, HTN, DM, AF, NIHSS, vessel occlusion, IVT, onset-to-groin puncture, mTICI, anti-HTN drip use, ICH, disposition   | 2, 5*                         |
| Panni, 2019 <sup>39</sup>    | Retrospective, ETIS | 216  | Admission:      | -         | 66 | 20 | 41 | 58 | -                                                                                                                     | 1, 3 <sup>†</sup>             |

|                                         |                       |     |                                |   |    |    |    |    |                                                   |                   |
|-----------------------------------------|-----------------------|-----|--------------------------------|---|----|----|----|----|---------------------------------------------------|-------------------|
|                                         |                       |     |                                |   |    |    |    |    |                                                   |                   |
| Petersen, 2019 <sup>40</sup>            | Retrospective         | 390 | During MT                      | - | 71 | 17 | 56 | 68 | -                                                 | 1 <sup>†</sup>    |
| Rasmussen, 2018 <sup>41</sup>           | Post-hoc RCT, GOLIATH | 128 | During MT                      | - | 71 | 17 | 49 | 75 | -                                                 | 1, 5 <sup>*</sup> |
| Schönenberger et al, 2018 <sup>42</sup> | Post-hoc RCT, SIESTA  | 150 | Admission, post-recanalization | - | 71 | 17 | 40 | 64 | Age, heart rate, baseline SBP/DBP, baseline NIHSS | 1 <sup>†</sup>    |
| Whalin, 2014 <sup>43</sup>              | Retrospective         | 83  | During MT                      | - | 66 | 19 | 50 | 53 | -                                                 | 1 <sup>†</sup>    |

Alberta stroke program early CT score; NIHSS, National Institutes of Health Stroke Scale; HTN, hypertension; HLD, hyperlipidemia; AF, atrial fibrillation; DM, diabetes mellitus; SBP, systolic blood pressure; RCT, randomized controlled trial; eGFR, estimated glomerular filtration rate; BMI, body mass index; TICI, thrombolysis in cerebral infarction; NASA, North American SOLITAIRE Stent-Retriever Acute Stroke; ETIS, Endovascular Treatment in Ischemic Stroke; GOLIATH, General or Local Anesthesia in Intra Arterial Therapy

<sup>†</sup>Unadjusted descriptive data; <sup>\*</sup> Adjusted multivariable data

**Table S4.** Quality assessment of included studies with the Newcastle-Ottawa Scale

| First author, Year | Selection | Comparability | Outcome | Overall |
|--------------------|-----------|---------------|---------|---------|
|--------------------|-----------|---------------|---------|---------|

|                                                      |      |    |     |     |
|------------------------------------------------------|------|----|-----|-----|
| Abou-Chebl, 2014 <sup>19</sup>                       | ***  | ** | *** | 8/9 |
| Anadani, 2019 <sup>20</sup>                          | **** | ** | **  | 8/9 |
| Bennett, 2018 <sup>21</sup>                          | **** | ** | *** | 9/9 |
| Cernik, 2019 <sup>22</sup>                           | **** | ** | **  | 8/9 |
| Chang, 2019 <sup>23</sup>                            | **** | ** | **  | 8/9 |
| Chang (recanalized), 2019 <sup>24</sup>              | **** | ** | **  | 8/9 |
| Cho, 2019 <sup>25</sup>                              | **** | ** | *** | 9/9 |
| Ding, 2019 <sup>26</sup>                             | **** | ** | *** | 9/9 |
| Goyal (post-MT, recanalized), 2017 <sup>27</sup>     | **** | ** | *** | 9/9 |
| Goyal (pre-MT), 2017 <sup>28</sup>                   | **** | ** | *** | 9/9 |
| Goyal (post-MT, non-recanalized), 2018 <sup>29</sup> | **** | ** | *** | 9/9 |
| Jagani, 2016 <sup>30</sup>                           | ***  | ** | *** | 8/9 |
| John, 2016 <sup>31</sup>                             | **** | ** | **  | 8/9 |
| John, 2017 <sup>32</sup>                             | **** | ** | *** | 9/9 |
| Kim, 2019 <sup>33</sup>                              | **** | ** | *** | 9/9 |
| Maier B, 2017 <sup>34</sup>                          | **** | ** | **  | 8/9 |
| Maier B, 2018 <sup>35</sup>                          | **** | ** | **  | 8/9 |
| Maier IL, 2018 <sup>36</sup>                         | **** | ** | *** | 8/9 |

|                                         |        |       |       |         |
|-----------------------------------------|--------|-------|-------|---------|
| McCarthy, 2019 <sup>37</sup>            | ****   | **    | ***   | 9/9     |
| Mistry, 2017 <sup>38</sup>              | ****   | **    | **    | 8/9     |
| Panni, 2019 <sup>39</sup>               | ****   | **    | **    | 8/9     |
| Petersen, 2019 <sup>40</sup>            | ****   | **    | **    | 8/9     |
| Rasmussen, 2018 <sup>41</sup>           | ****   | **    | ***   | 9/9     |
| Schönenberger et al, 2018 <sup>42</sup> | ****   | **    | ***   | 9/9     |
| Whalin, 2014 <sup>43</sup>              | ***    | **    | ***   | 8/9     |
| Total                                   | 97/100 | 50/50 | 66/75 | 213/225 |

**Table S5.** Quality assessment of included studies with the Risk of Bias in Non-randomized Studies of Exposures (ROBINS-E) Scale

| First author, Year                     | Confounding | Selection of participants into the study | Classification of exposures | Departures from intended exposures | Missing Data | Measurement of outcomes | Selection of the reported result | Overall Bias |
|----------------------------------------|-------------|------------------------------------------|-----------------------------|------------------------------------|--------------|-------------------------|----------------------------------|--------------|
| Abou-Chebl, 2014                       | **          | **                                       | *                           | *                                  | **           | **                      | *                                | **           |
| Anadani, 2019                          | *           | *                                        | *                           | *                                  | *            | **                      | *                                | *            |
| Bennett, 2018                          | *           | *                                        | *                           | *                                  | **           | **                      | *                                | **           |
| Cernik, 2019                           | *           | *                                        | *                           | *                                  | *            | **                      | *                                | *            |
| Chang, 2019                            | *           | *                                        | *                           | *                                  | *            | **                      | *                                | *            |
| Chang (recanalized), 2019              | *           | *                                        | *                           | *                                  | **           | *                       | *                                | *            |
| Cho, 2019                              | *           | *                                        | *                           | *                                  | **           | *                       | *                                | *            |
| Ding, 2019                             | *           | *                                        | *                           | *                                  | **           | *                       | *                                | *            |
| Goyal (post-MT, recanalized), 2017     | *           | *                                        | *                           | *                                  | **           | *                       | *                                | *            |
| Goyal (pre-MT), 2017                   | *           | *                                        | *                           | *                                  | **           | *                       | *                                | *            |
| Goyal (post-MT, non-recanalized), 2018 | *           | *                                        | *                           | *                                  | **           | *                       | *                                | *            |
| Jagani, 2016                           | *           | **                                       | *                           | *                                  | **           | **                      | *                                | **           |



|                     |    |   |   |   |    |    |   |    |
|---------------------|----|---|---|---|----|----|---|----|
| John, 2016          | *  | * | * | * | ** | ** | * | ** |
| John, 2017          | ** | * | * | * | ** | *  | * | ** |
| Kim, 2019           | *  | * | * | * | ** | *  | * | *  |
| Maier B, 2017       | *  | * | * | * | *  | ** | * | *  |
| Maier B, 2018       | *  | * | * | * | *  | ** | * | *  |
| Maier IL, 2018      | *  | * | * | * | ** | *  | * | *  |
| McCarthy, 2019      | *  | * | * | * | ** | *  | * | *  |
| Mistry, 2017        | *  | * | * | * | *  | ** | * | *  |
| Panni, 2019         | *  | * | * | * | ** | *  | * | *  |
| Petersen, 2019      | *  | * | * | * | ** | *  | * | *  |
| Rasmussen, 2018     | *  | * | * | * | *  | *  | * | *  |
| Schonenberger, 2018 | *  | * | * | * | *  | *  | * | *  |
| Whalin, 2014        | *  | * | * | * | ** | ** | * | ** |

\*Low, \*\*Medium, and \*\*\*High risk of bias

**Table S6.** Overview of primary and secondary analyses of during-treatment BP association with available outcomes

| Clinical outcome | BP level | Unadjusted analyses |                        |              |                                                         | Adjusted analyses |                     |                  |                                                         |
|------------------|----------|---------------------|------------------------|--------------|---------------------------------------------------------|-------------------|---------------------|------------------|---------------------------------------------------------|
|                  |          | Studies             | SMD (95% CI)           | <i>P</i>     | Heterogeneity (I <sup>2</sup> , <i>P</i> for Cochran Q) | Studies           | OR (95% CI)         | <i>P</i>         | Heterogeneity (I <sup>2</sup> , <i>P</i> for Cochran Q) |
| FI               | Max SBP  | 4                   | -0.37 (-0.62 to -0.12) | <b>0.004</b> | 55%, 0.08                                               | 2                 | 0.93 (0.90 to 0.96) | <b>&lt;0.001</b> | 0%, 0.78                                                |
|                  | Min SBP  | 3                   | 0.07 (-0.30 to 0.44)   | 0.71         | 67%, 0.05                                               | -                 | -                   | -                | -                                                       |
|                  | Max DBP  | 3                   | -0.16 (-0.49 to 0.16)  | 0.32         | 54%, 0.12                                               | -                 | -                   | -                | -                                                       |
|                  | Min DBP  | 2                   | 0.25 (-0.35 to 0.84)   | 0.42         | 73%, 0.05                                               | -                 | -                   | -                | -                                                       |

BP, blood pressure; SMD, standardized mean difference; CI, confidence interval; OR, odds ratio; SBP, systolic blood pressure; DBP, diastolic blood pressure; FI, functional independence (mRS 0–2)

### Supplemental Figures

**Figure S1.** Flow-chart diagram presenting the selection of eligible studies.

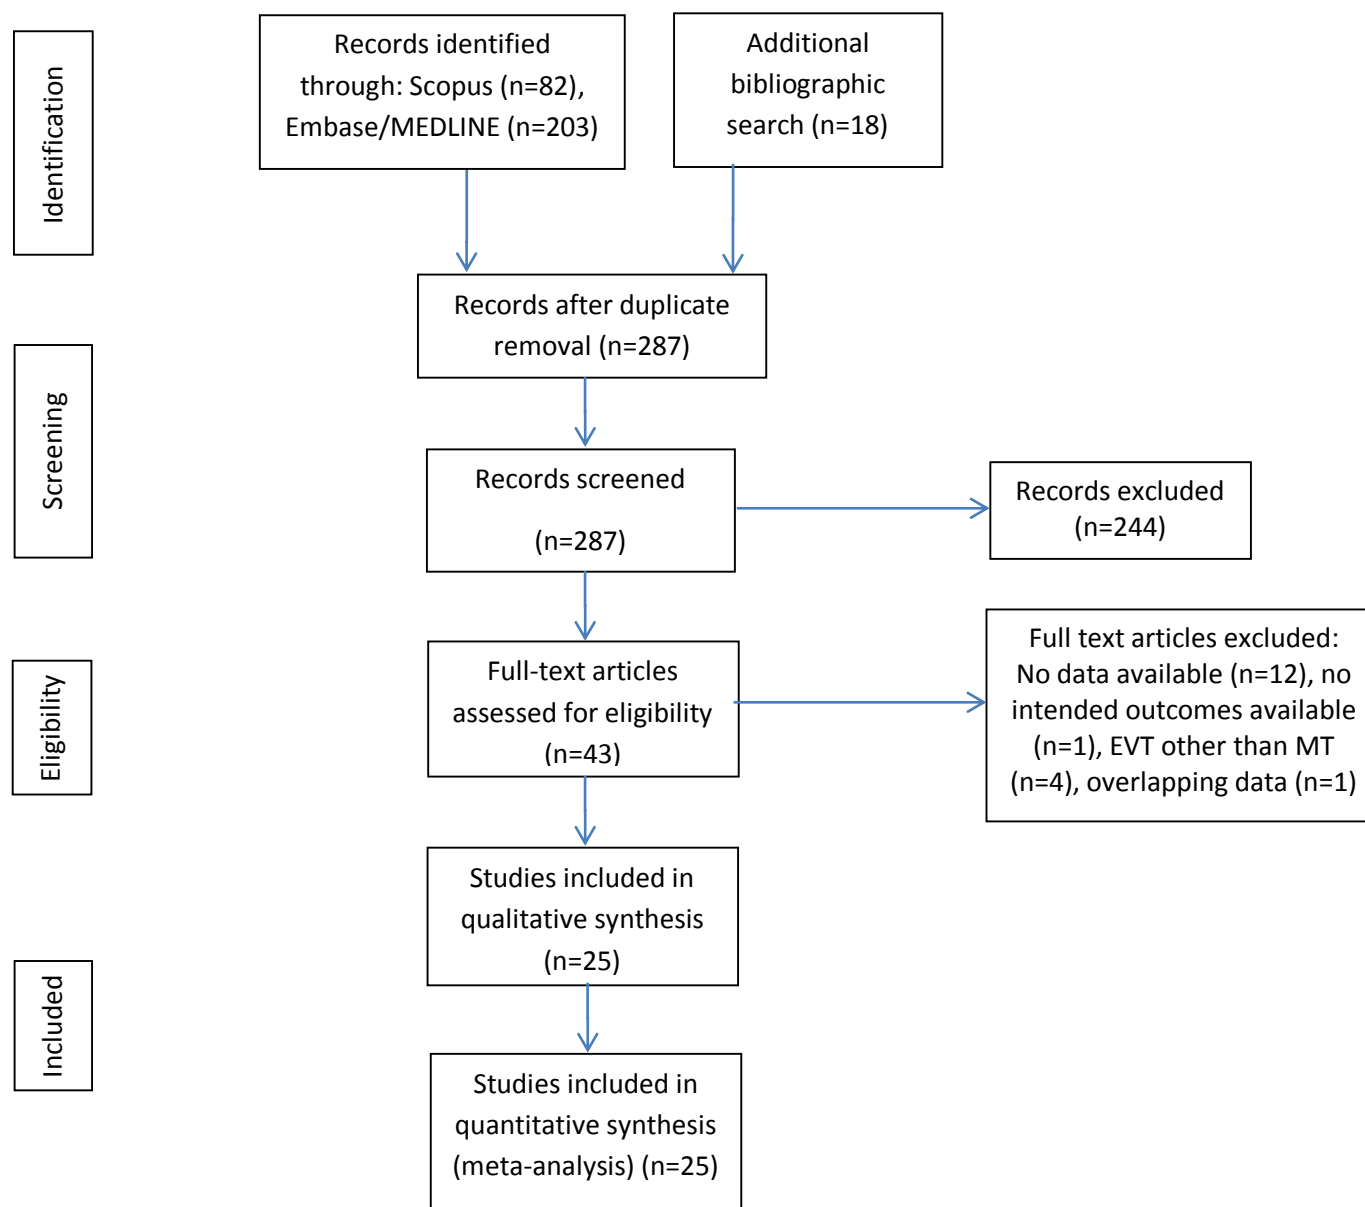

**Figure S2.** Forest plots evaluating the associations of pre-treatment mean (A) systolic blood pressure levels and (B) diastolic blood pressure levels with 3-month functional independence. mRS, modified Rankin Scale; Std., standardized; SD, standard deviation; MT, Mechanical Thrombectomy; IV, Inverse Variance; CI, confidence interval.

A)

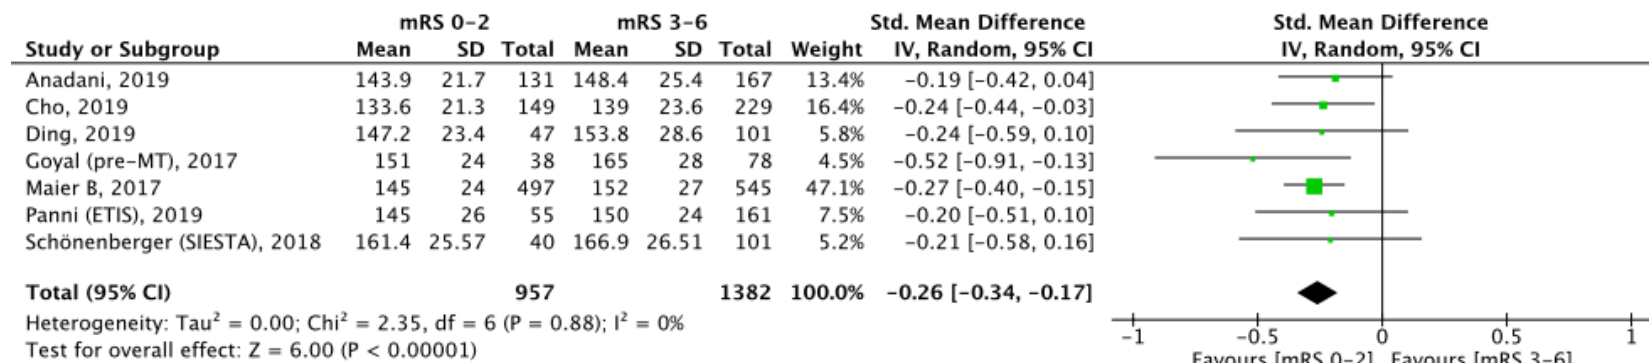

B)

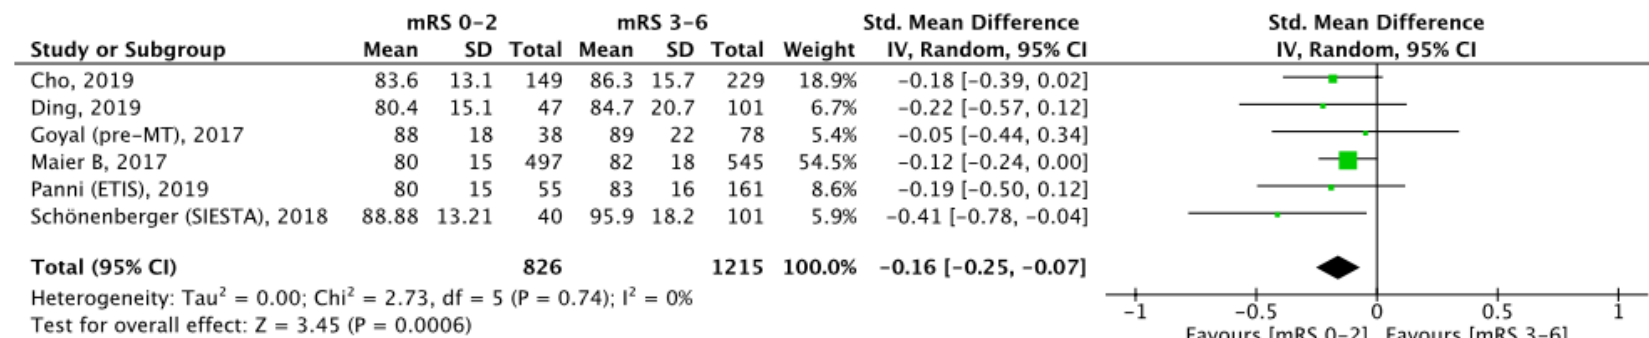

**Figure S3.** Forest plots evaluating the association of pre-treatment mean (A) systolic blood pressure levels and (B) diastolic blood pressure levels with successful recanalization. mRS, modified Rankin Scale; Std., standardized; SD, standard deviation; MT, Mechanical Thrombectomy; IV, Inverse Variance; CI, confidence interval.

A)

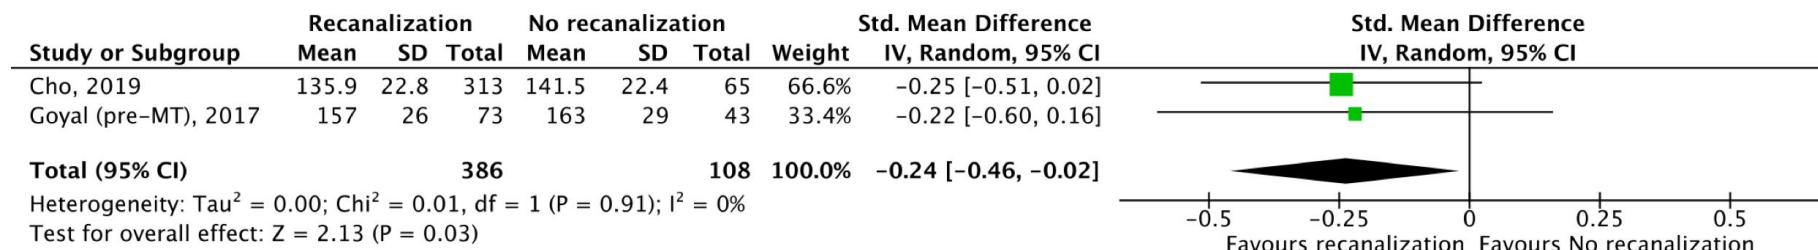

B)

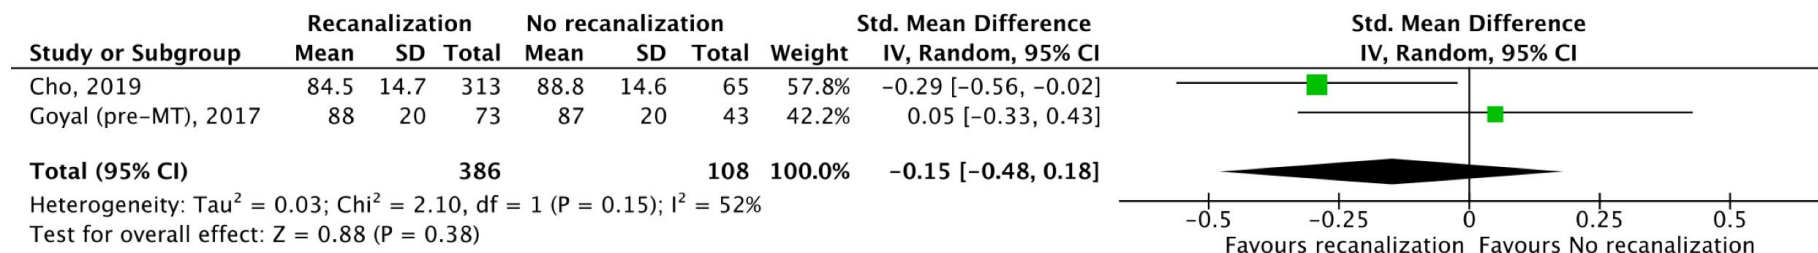

**Figure S4.** Forest plots evaluating the association of pre-treatment mean (A) systolic blood pressure levels and (B) diastolic blood pressure levels with 3-month mortality. mRS, modified Rankin Scale; Std., standardized; SD, standard deviation; MT, Mechanical Thrombectomy; IV, Inverse Variance; CI, confidence interval.

A)

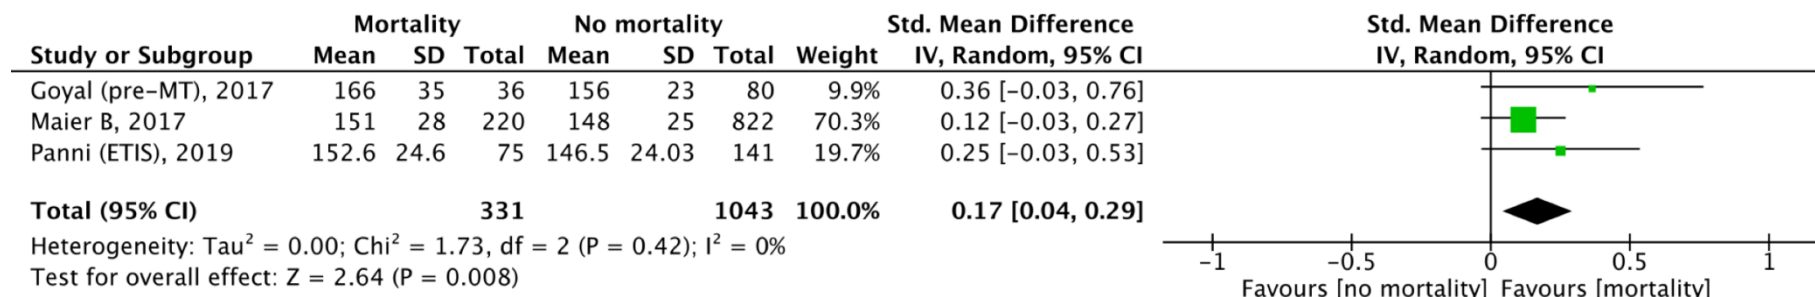

B)

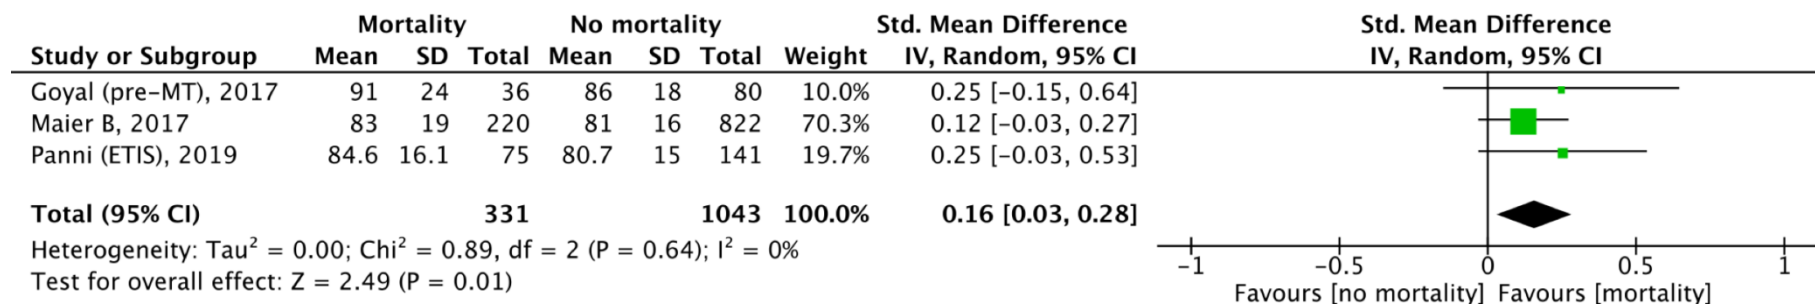

**Figure S5.** Forest plots evaluating the association of pre-treatment mean (A) systolic blood pressure levels and (B) diastolic blood pressure levels with symptomatic intracranial hemorrhage. mRS, modified Rankin Scale; Std., standardized; SD, standard deviation; MT, Mechanical Thrombectomy; IV, Inverse Variance; CI, confidence interval.

A)

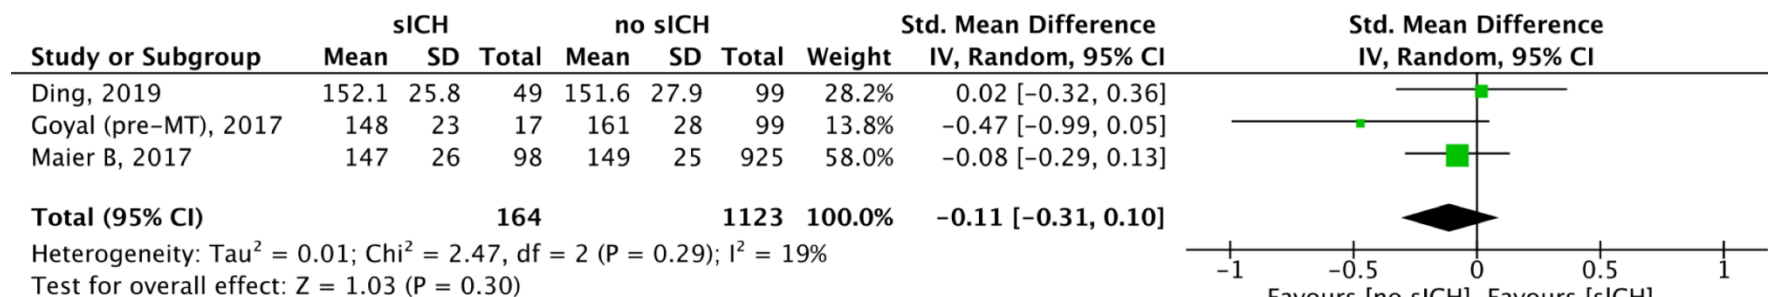

B)

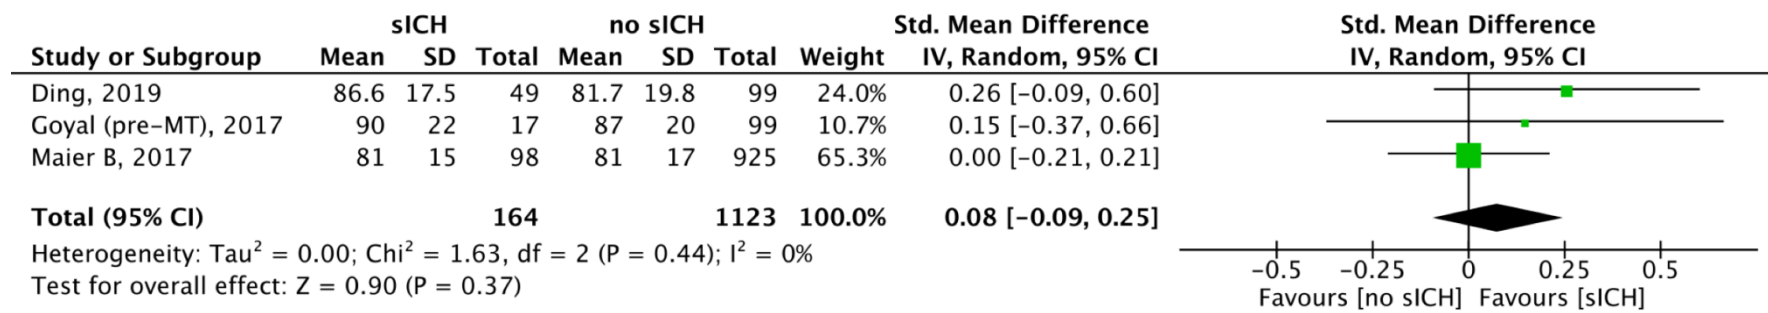

**Figure S6.** Forest plots evaluating the association of during treatment (A) maximum systolic blood pressure levels and (B) minimum systolic blood pressure levels with 3-month functional independence. mRS, modified Rankin Scale; Std., standardized; SD, standard deviation; IV, Inverse Variance; CI, confidence interval.

A)

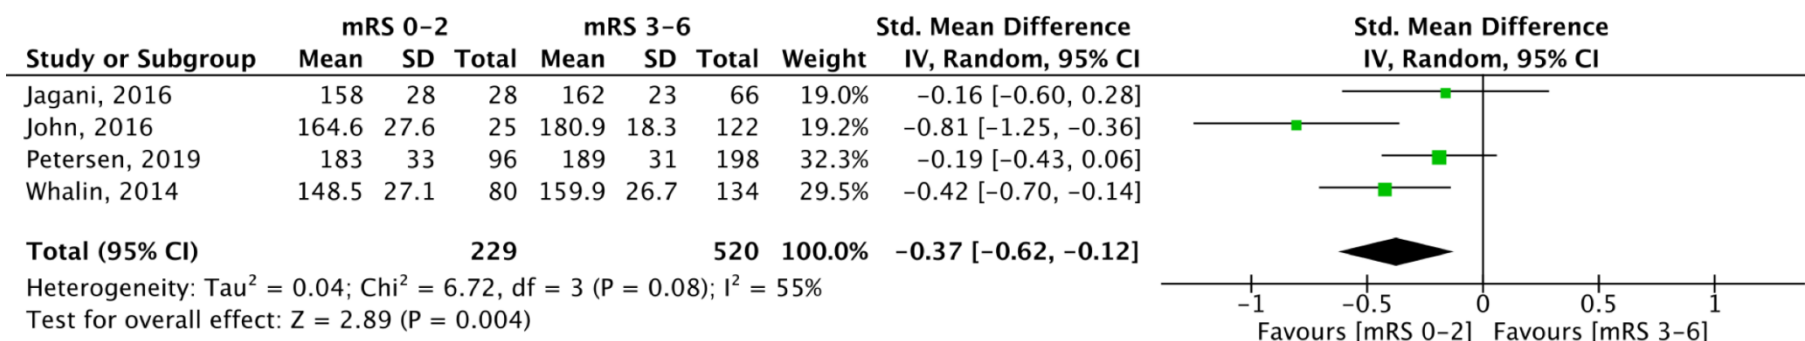

B)

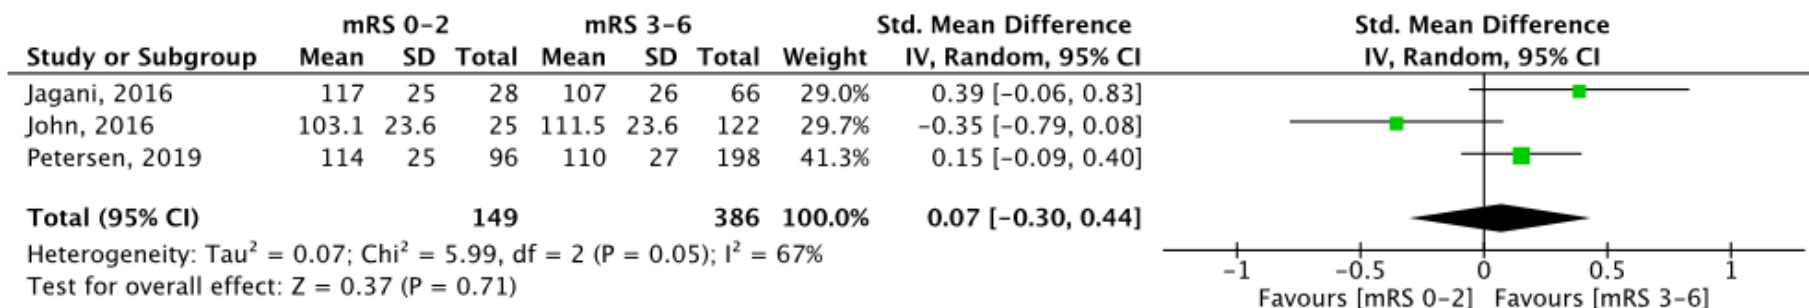



**Figure S7.** Forest plots evaluating the association of during treatment (A) maximum diastolic blood pressure levels and (B) minimum diastolic blood pressure levels with 3-month functional independence. mRS, modified Rankin Scale; Std., standardized; SD, standard deviation; IV, Inverse Variance; CI, confidence interval.

A)

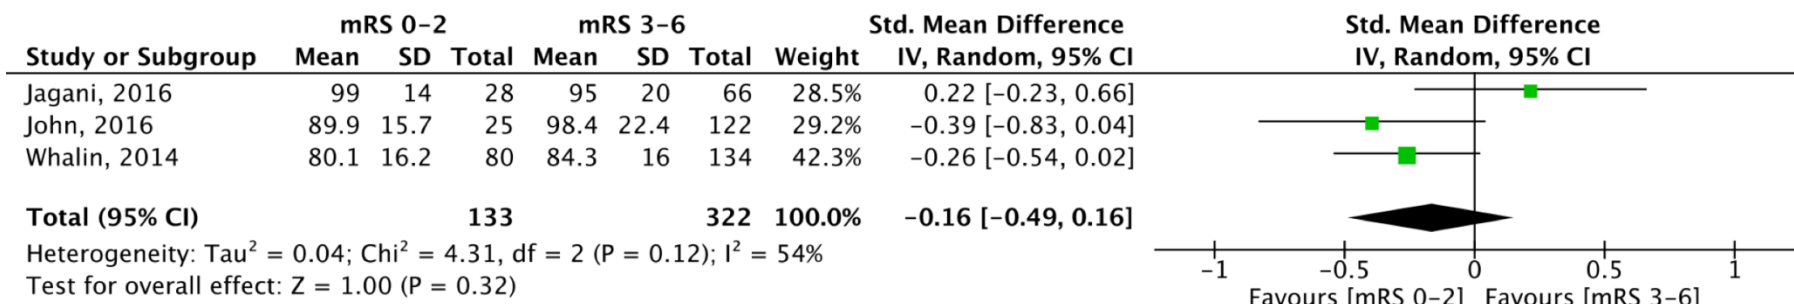

B)

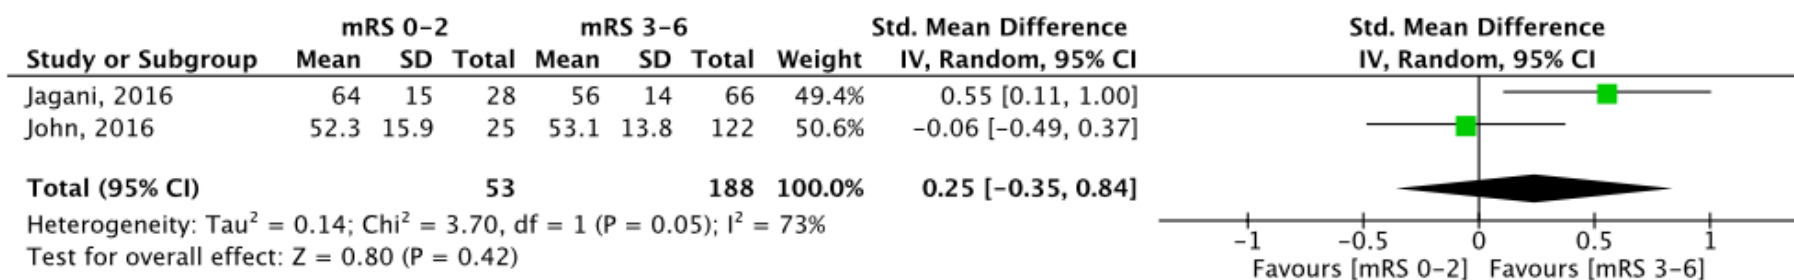

**Figure S8.** Forest plots evaluating the association of post-treatment maximum systolic blood pressure levels with 3-month functional independence. mRS, modified Rankin Scale; Std., standardized; SD, standard deviation; MT, Mechanical Thrombectomy; IV, Inverse Variance; CI, confidence interval.

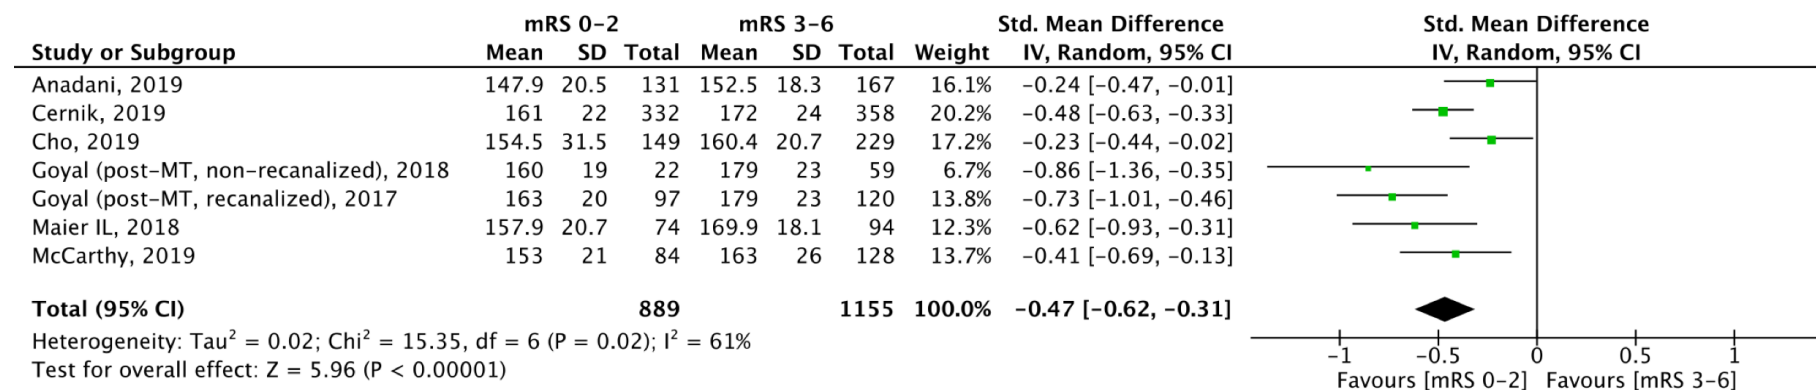

**Figure S9.** Forest plots evaluating the association of post-treatment A) maximum diastolic blood pressure levels and B) mean diastolic blood pressure levels with 3-month functional independence. mRS, modified Rankin Scale; Std., standardized; SD, standard deviation; MT, Mechanical Thrombectomy; IV, Inverse Variance; CI, confidence interval.

A)

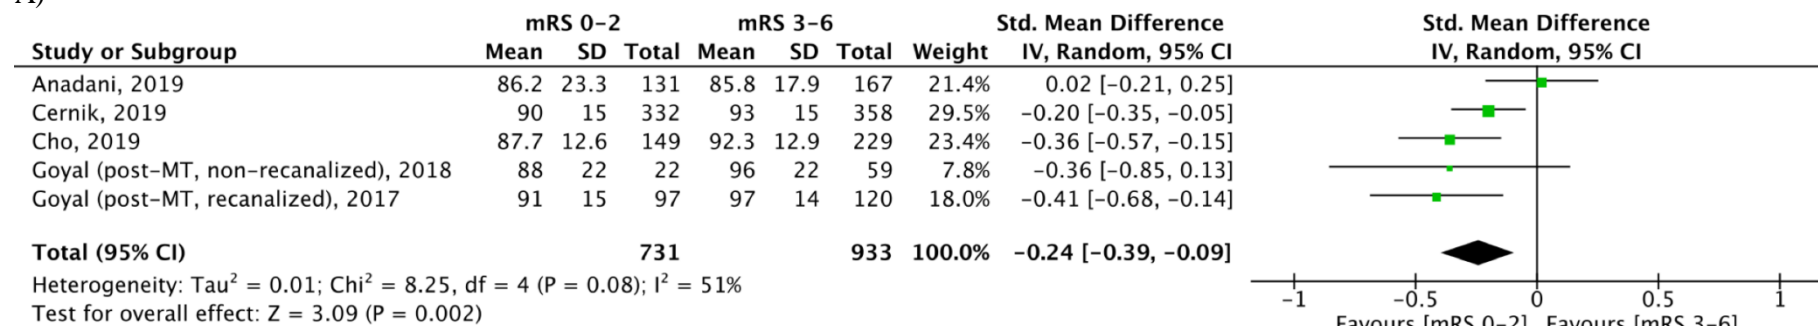

B)

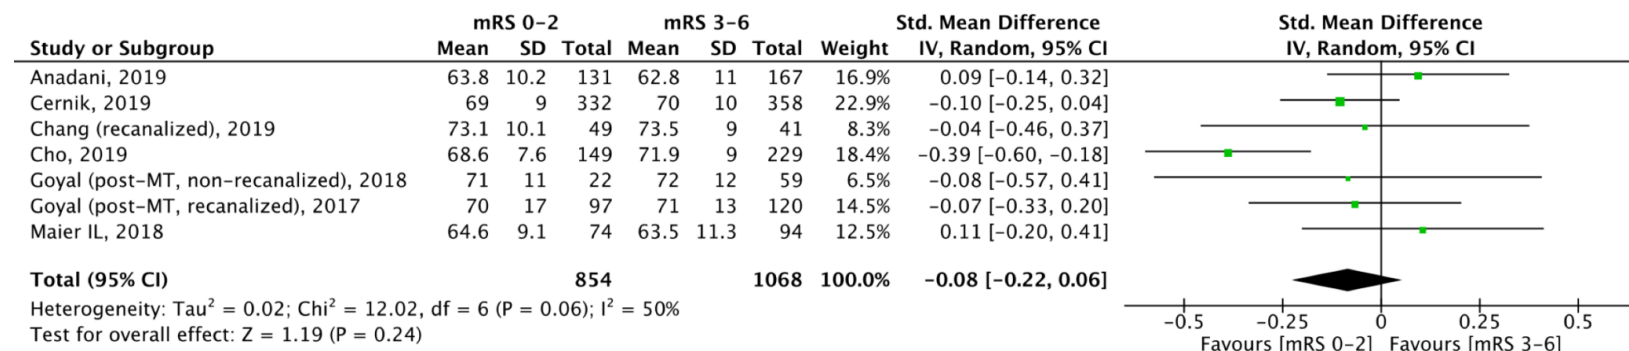

**Figure S10.** Forest plots evaluating the association of post-treatment A) minimum systolic blood pressure levels and B) minimum diastolic blood pressure levels with 3-month functional independence. mRS, modified Rankin Scale; Std., standardized; SD, standard deviation; MT, Mechanical Thrombectomy; IV, Inverse Variance; CI, confidence interval.

A)

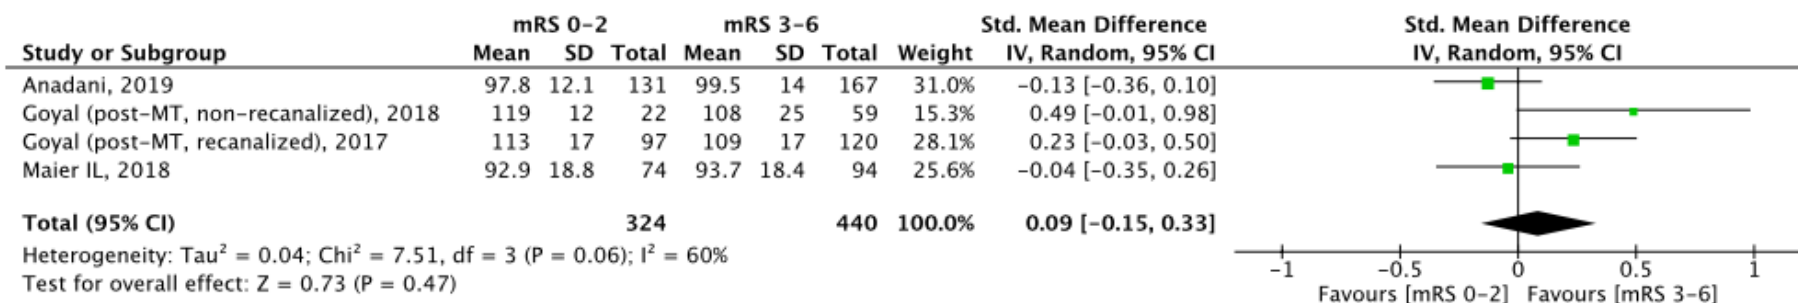

B)

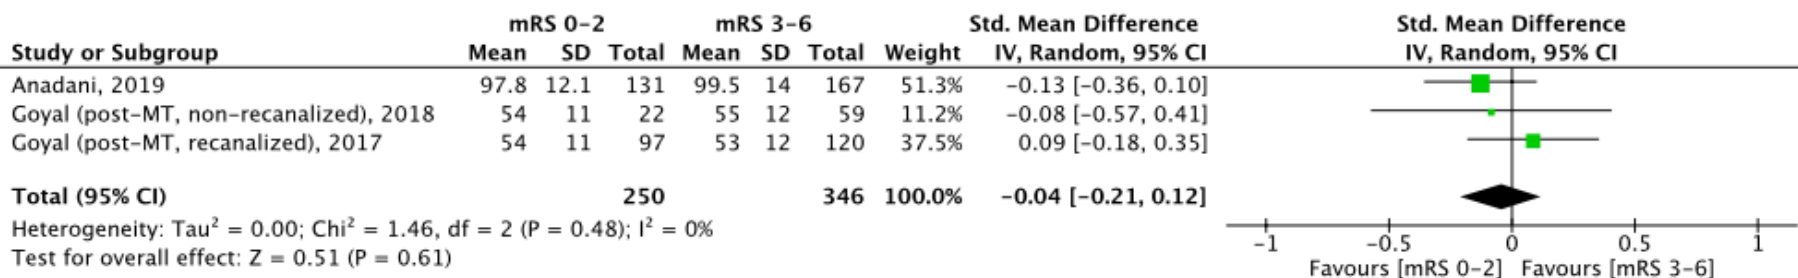

**Figure S11.** Forest plots evaluating the association of post-treatment A) maximum systolic blood pressure and B) mean systolic blood pressure levels with successful recanalization. mRS, modified Rankin Scale; Std., standardized; SD, standard deviation; IV, Inverse Variance; CI, confidence interval.

A)

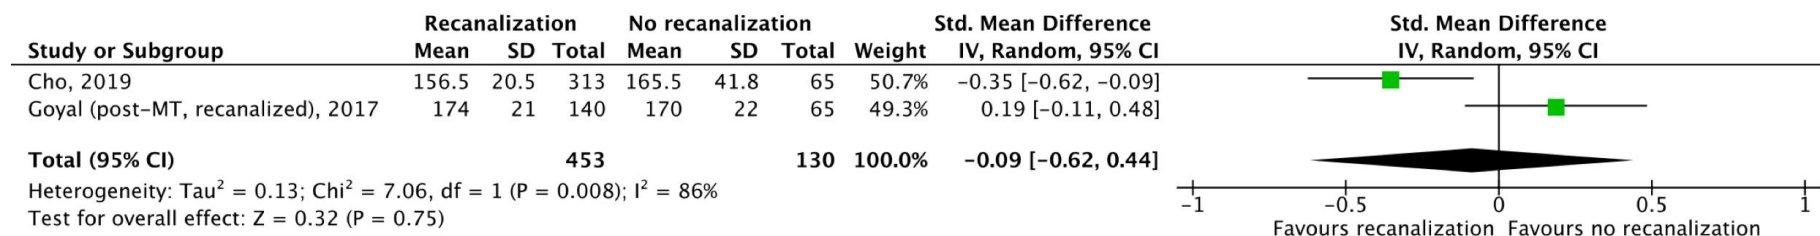

B)

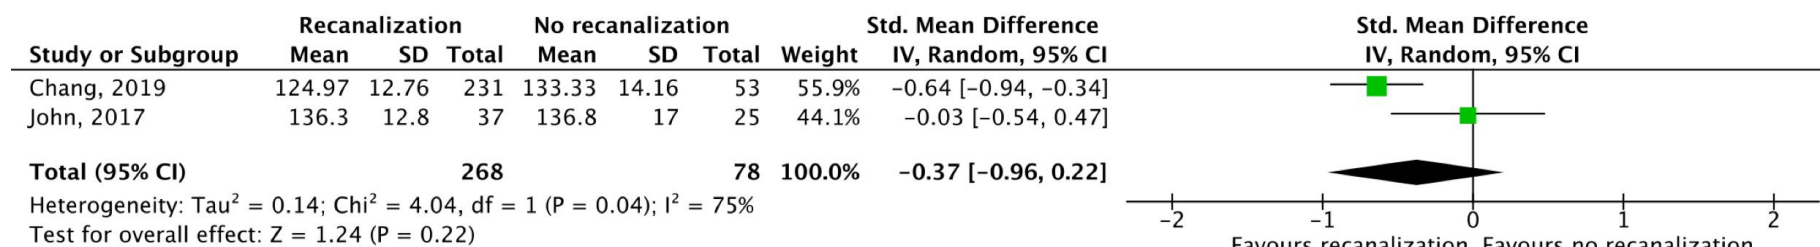

**Figure S12.** Forest plots evaluating the association of post-treatment A) maximum diastolic blood pressure levels and B) mean diastolic blood pressure levels with 3-month mortality. mRS, modified Rankin Scale; Std., standardized; SD, standard deviation; MT, Mechanical Thrombectomy; IV, Inverse Variance; CI, confidence interval.

A)

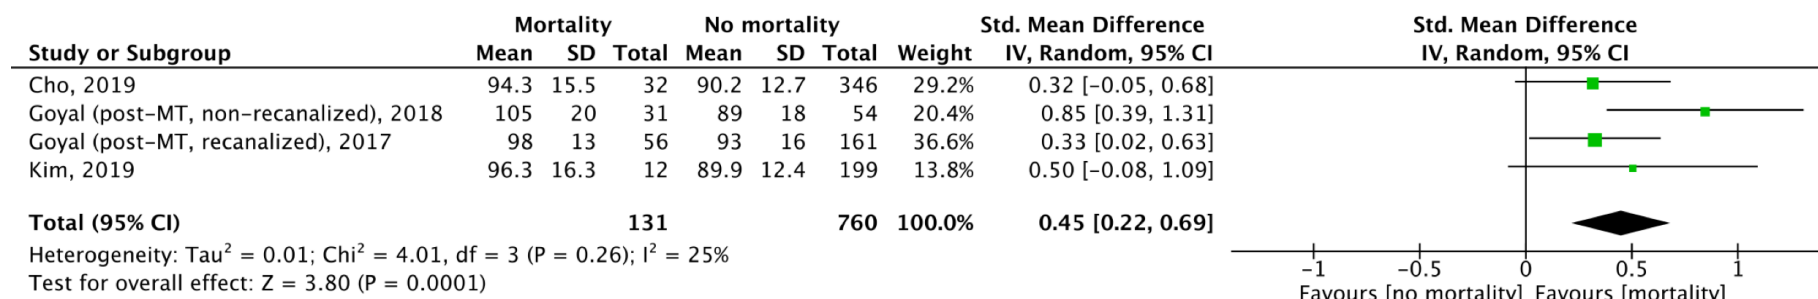

B)

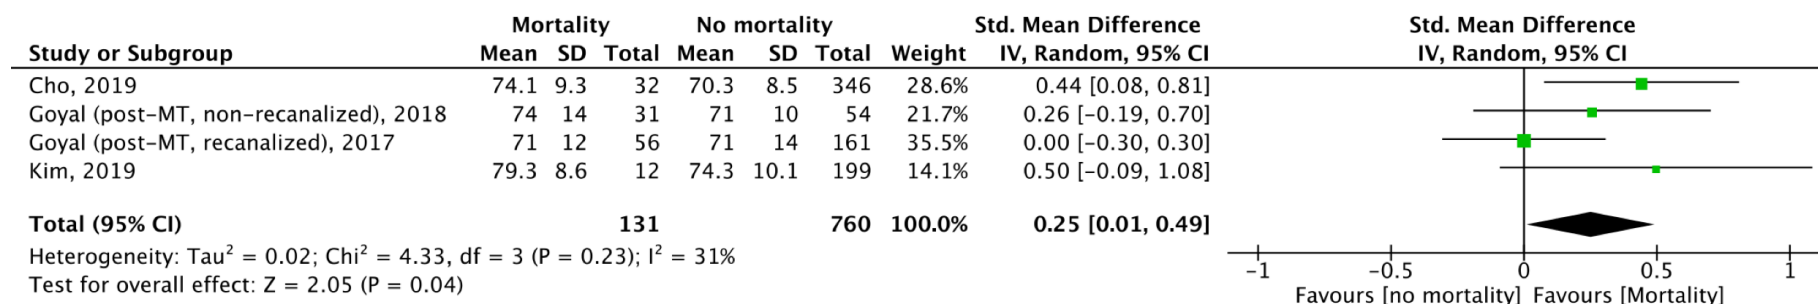

**Figure S13.** Forest plots evaluating the association of post-treatment mean systolic blood pressure levels with 3-month mortality. mRS, modified Rankin Scale; Std., standardized; SD, standard deviation; MT, Mechanical Thrombectomy; IV, Inverse Variance; CI, confidence interval.

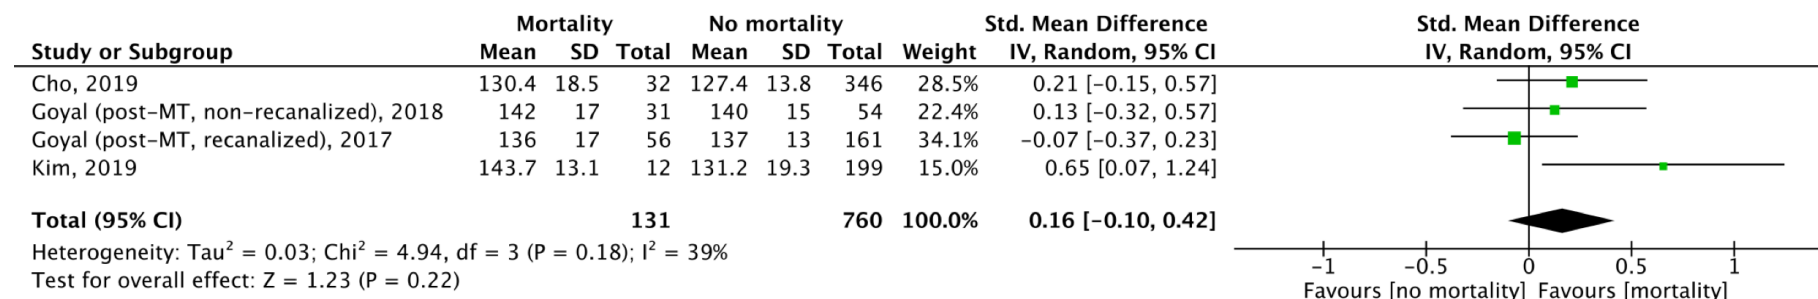

**Figure S14.** Forest plots evaluating the association of post-treatment A) minimum systolic blood pressure levels and B) minimum diastolic blood pressure levels with 3-month mortality. mRS, modified Rankin Scale; Std., standardized; SD, standard deviation; MT, Mechanical Thrombectomy; IV, Inverse Variance; CI, confidence interval.

A)

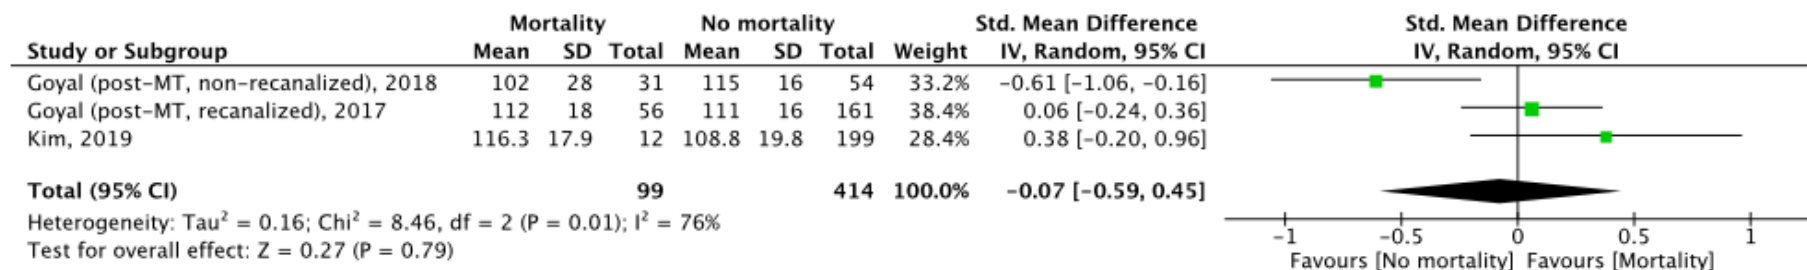

B)

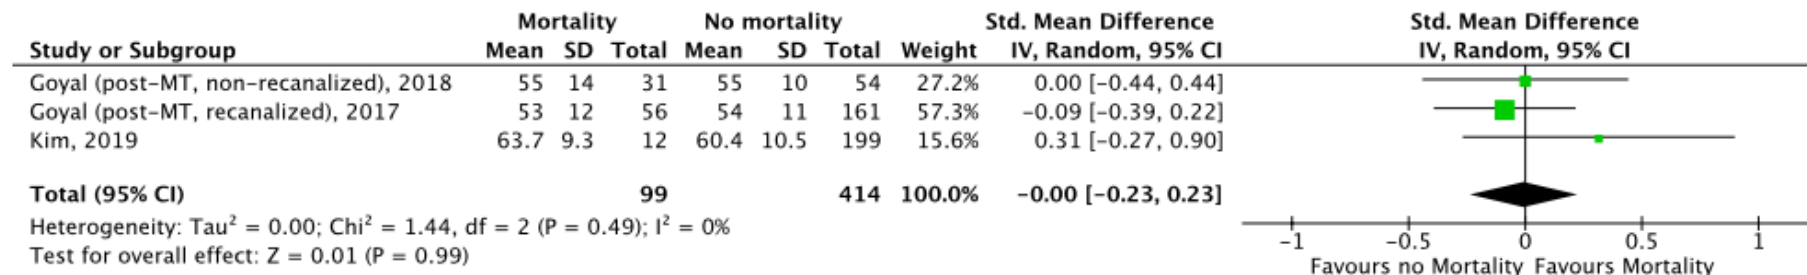



**Figure S15.** Forest plots evaluating the association of post-treatment A) maximum, B) minimum and C) mean systolic blood pressure levels with symptomatic intracranial hemorrhage. mRS, modified Rankin Scale; Std., standardized; SD, standard deviation; MT, Mechanical Thrombectomy; IV, Inverse Variance; CI, confidence interval.

A)

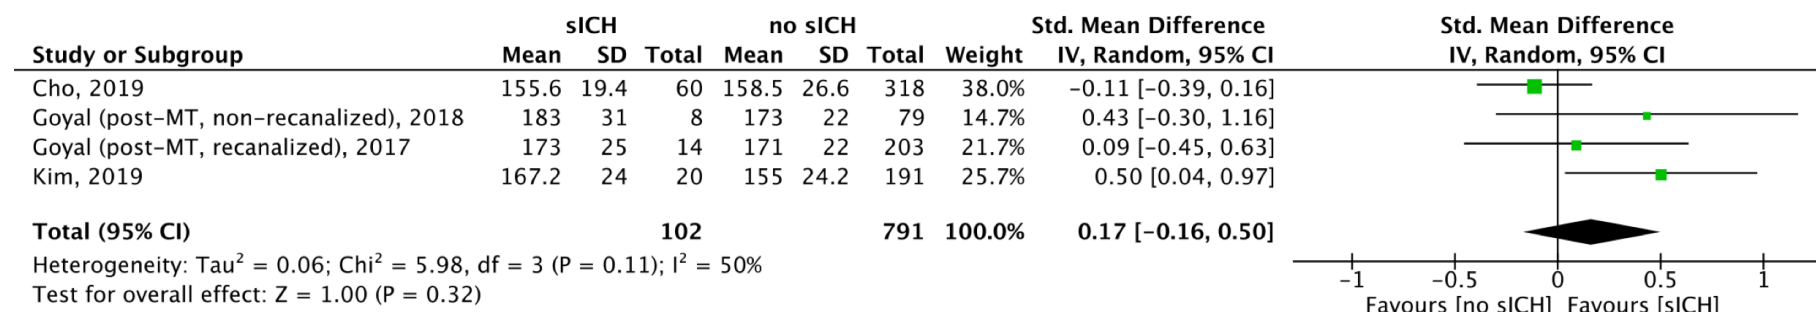

B)

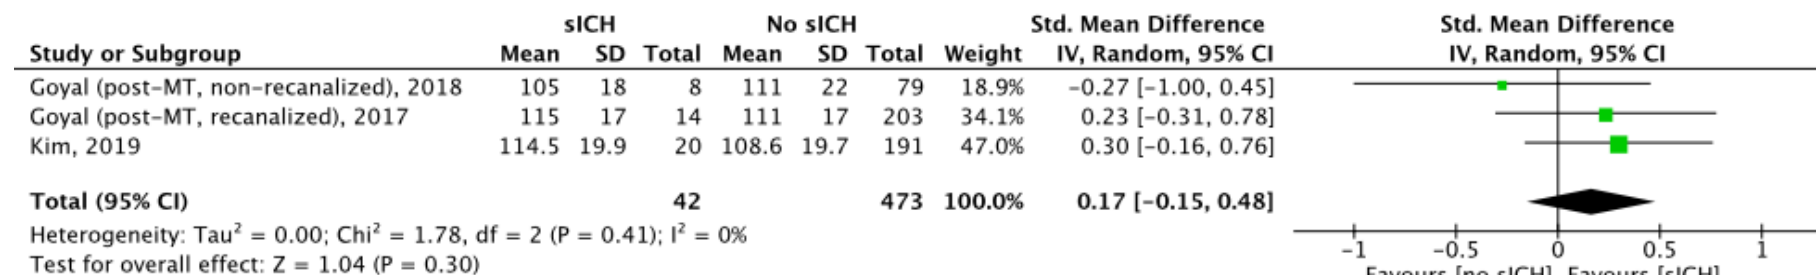

C)

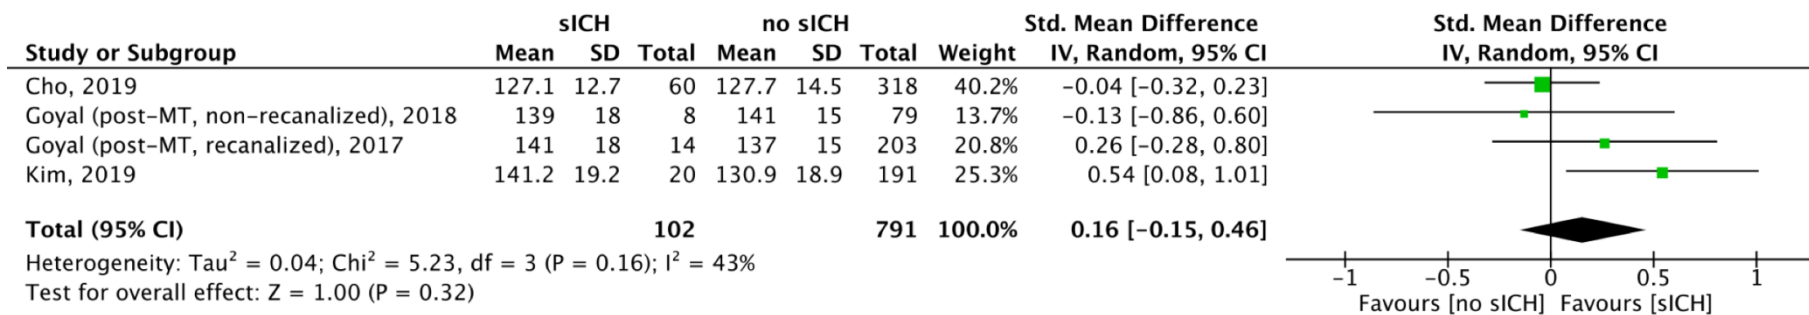

**Figure S16.** Forest plots evaluating the association of post-treatment A) minimum and B) mean diastolic blood pressure levels with symptomatic intracranial hemorrhage. mRS, modified Rankin Scale; Std., standardized; SD, standard deviation; MT, Mechanical Thrombectomy; IV, Inverse Variance; CI, confidence interval.

A)

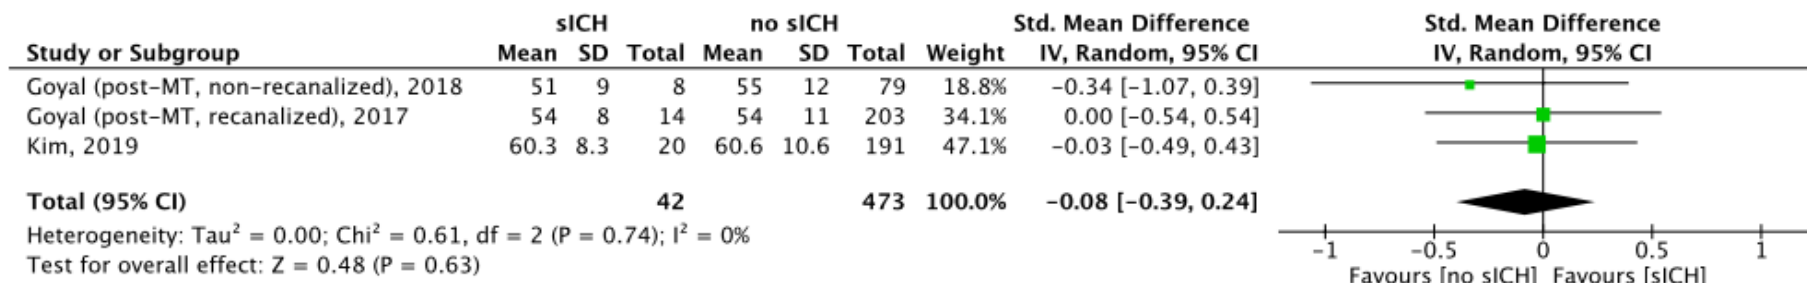

B)

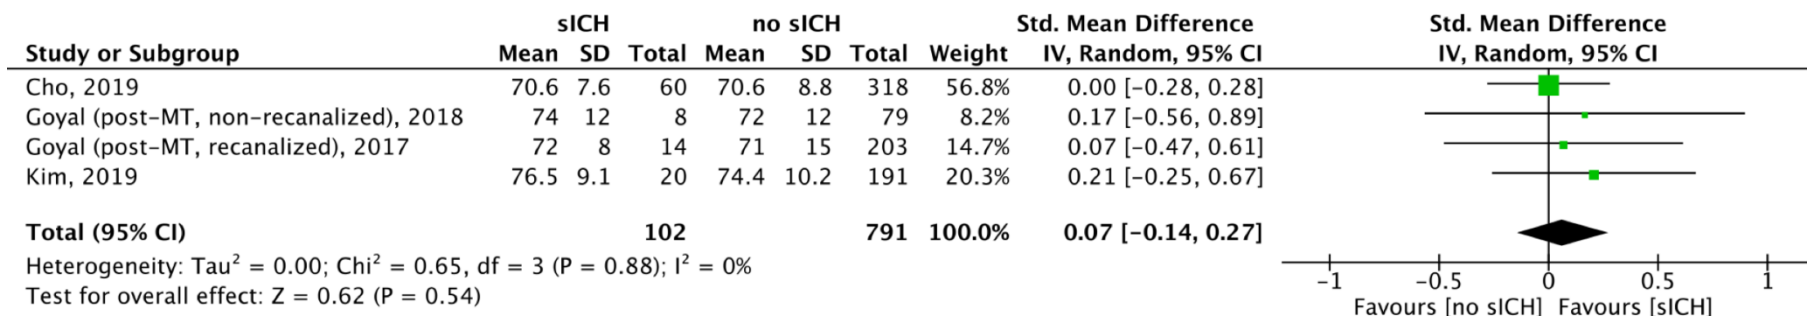

**Figure S17.** Forest plot evaluating the association of post-treatment A) maximum and B) mean systolic blood pressure levels with 3-month functional deterioration. SE, standard error; MT, Mechanical Thrombectomy; IV, Inverse Variance; CI, confidence interval.

A)

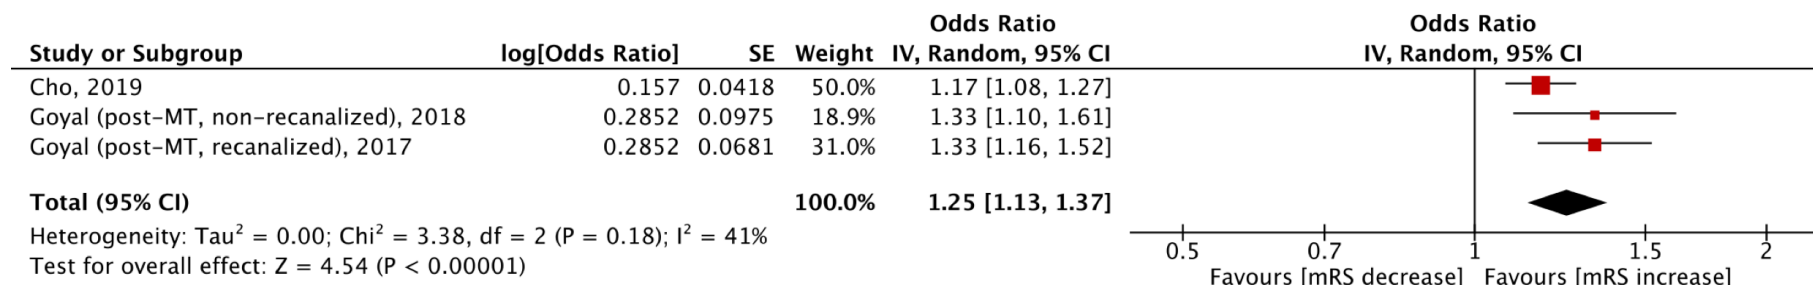

B)

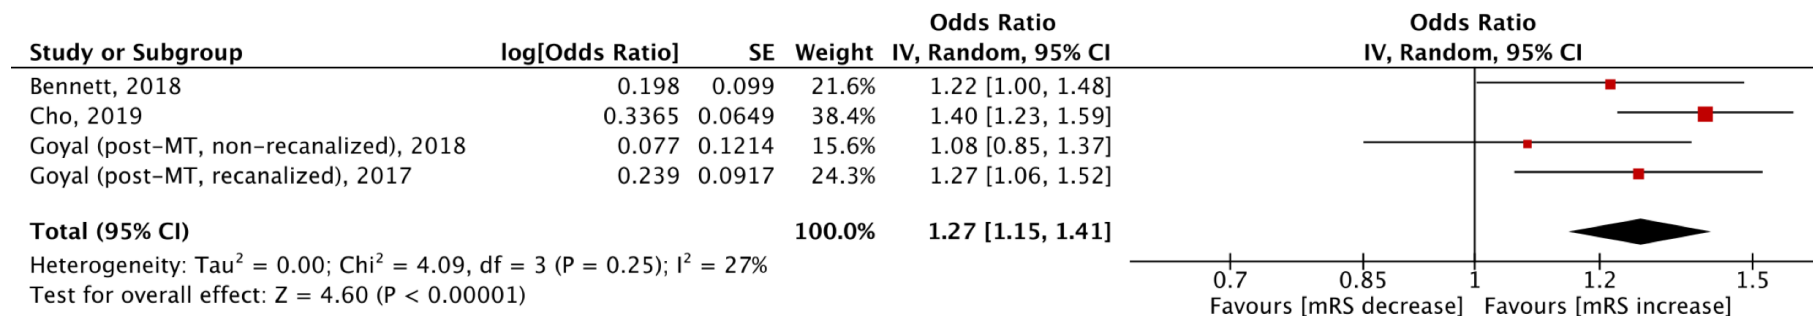

**Figure S18.** Forest plot evaluating the association of post-treatment A) maximum and B) mean diastolic blood pressure levels with 3-month functional deterioration. SE, standard error; MT, Mechanical Thrombectomy; IV, Inverse Variance; CI, confidence interval.

A)

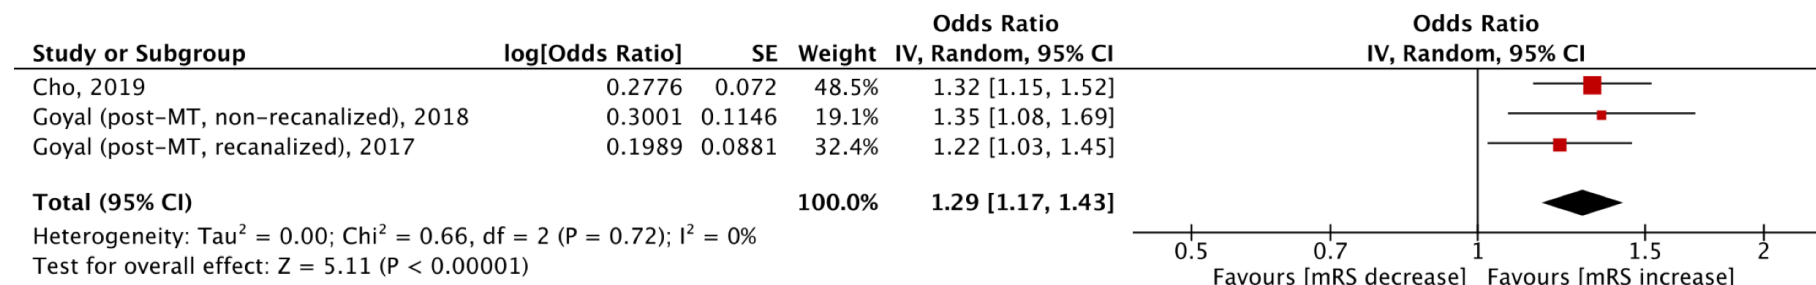

B)

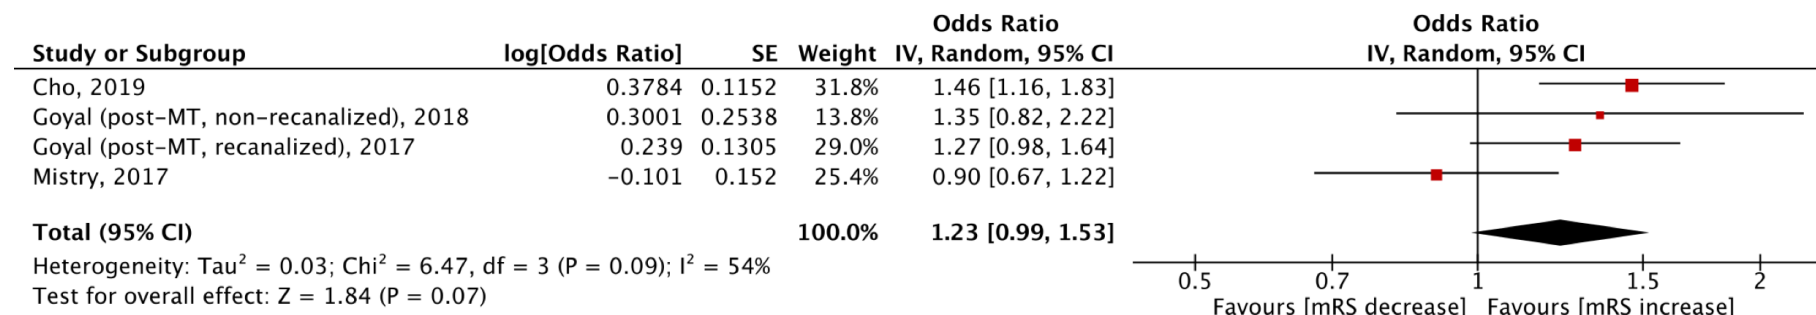

**Figure S19.** Forest plots evaluating the association of post-treatment A) systolic blood pressure variability and B) diastolic blood pressure variability with 3-month functional independence. mRS, modified Rankin Scale; Std., standardized; SD, standard deviation; IV, Inverse Variance; CI, confidence interval.

A)

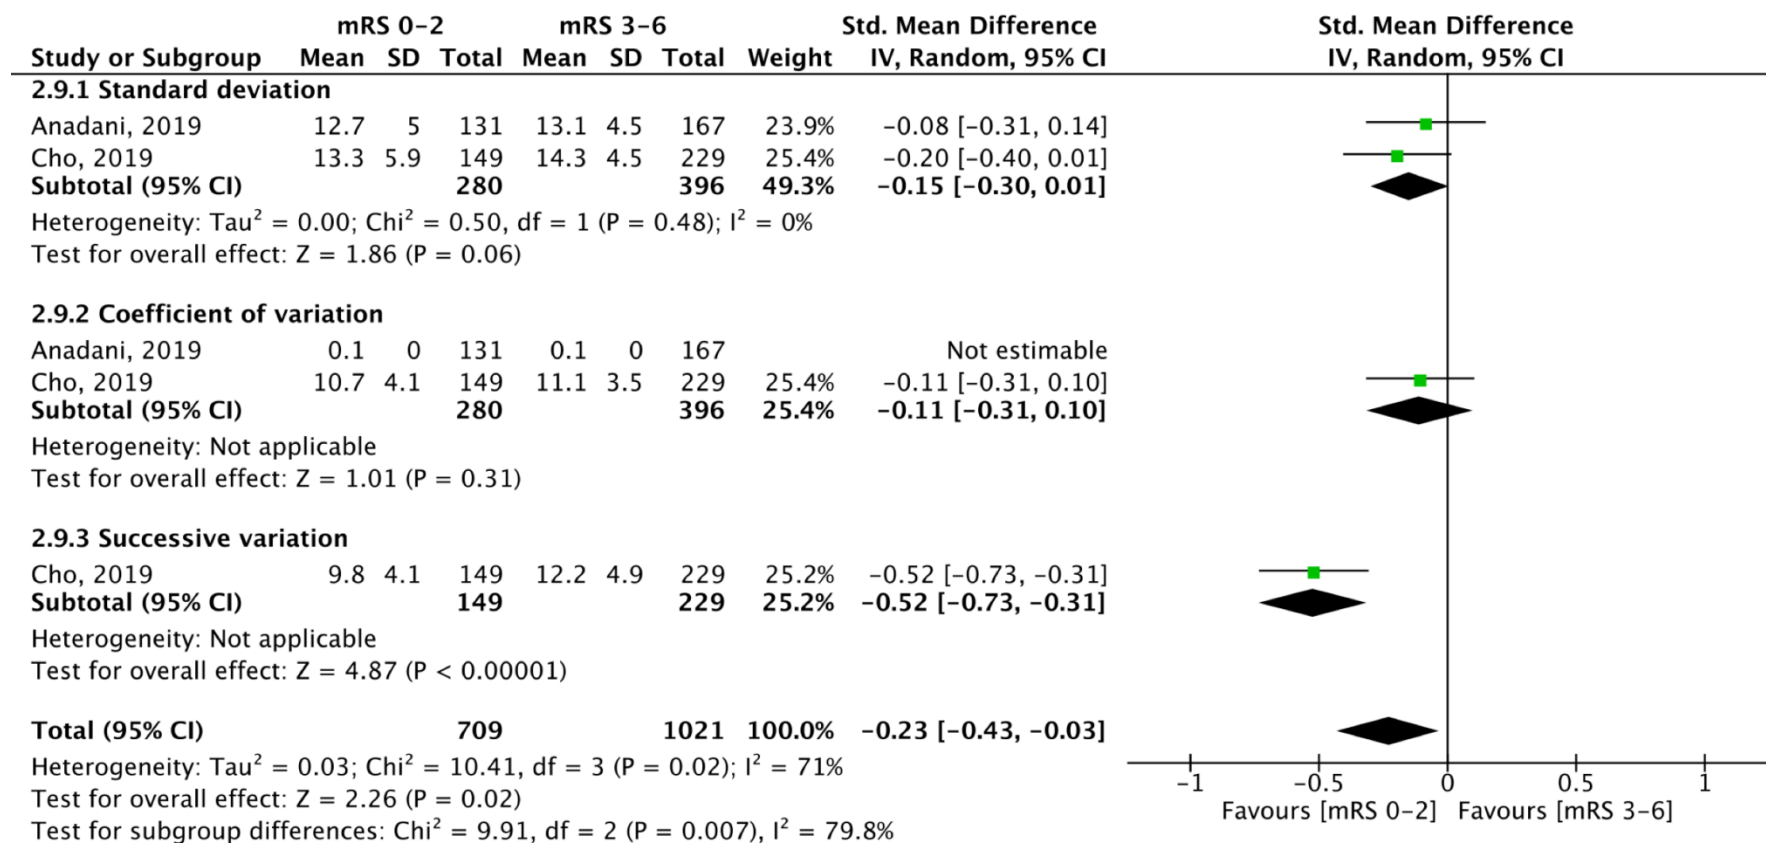

B)

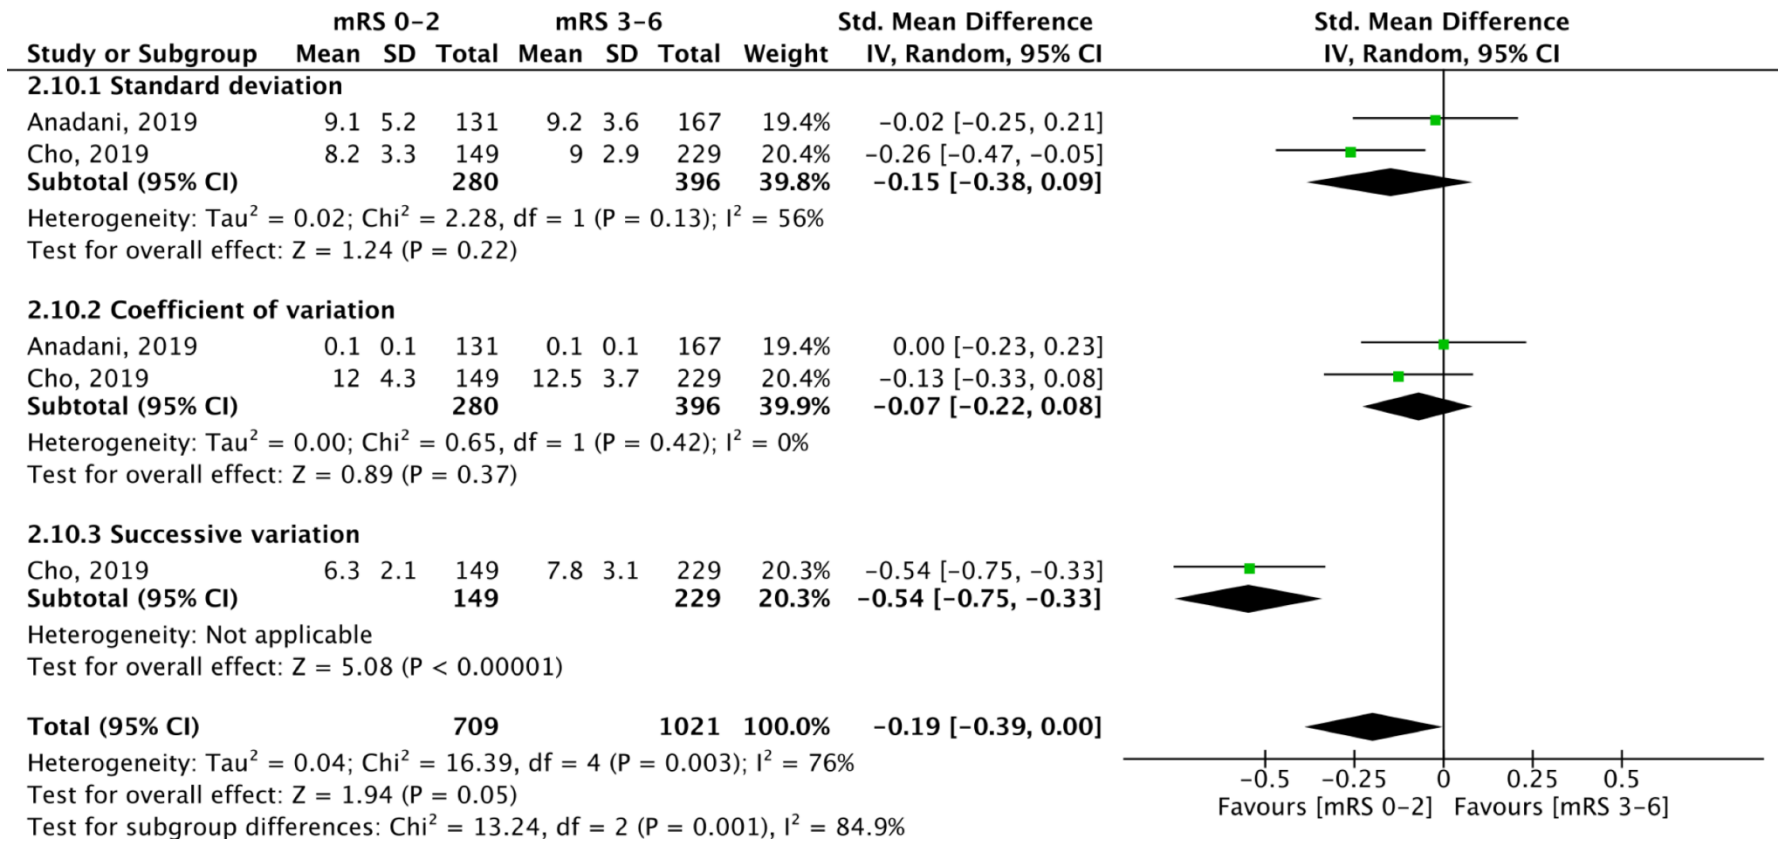

**Figure S20.** Forest plots evaluating the association of post-treatment A) systolic blood pressure variability and B) diastolic blood pressure variability with 3-month mortality. mRS, modified Rankin Scale; Std., standardized; SD, standard deviation; IV, Inverse Variance; CI, confidence interval.

A)

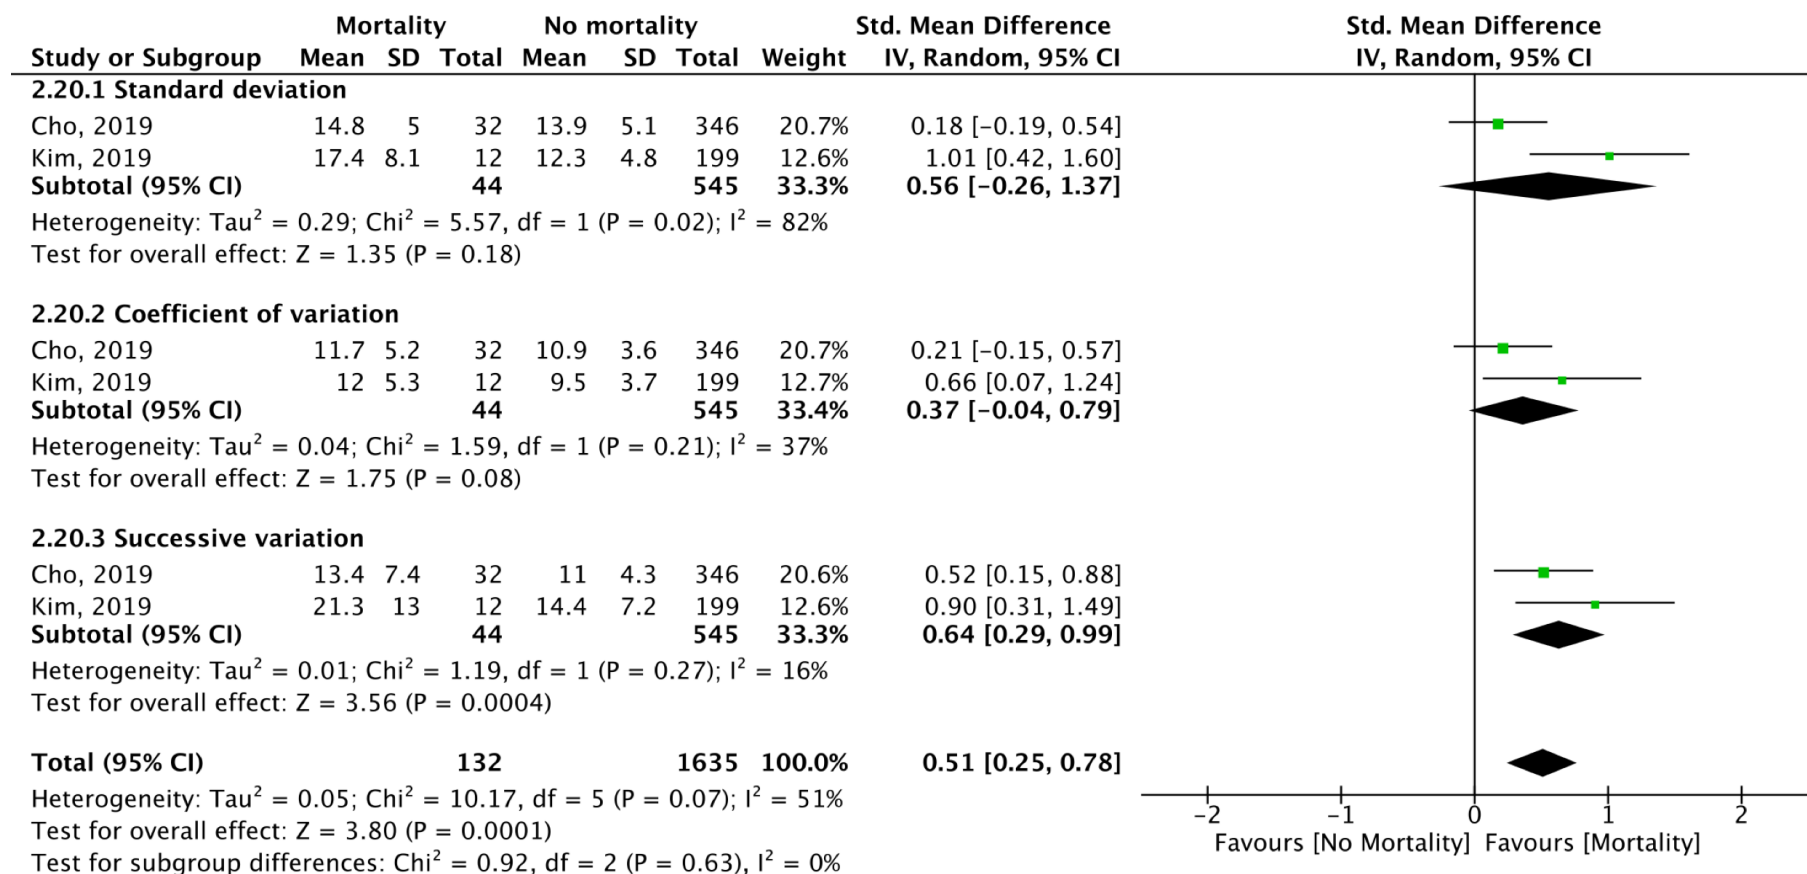



B)

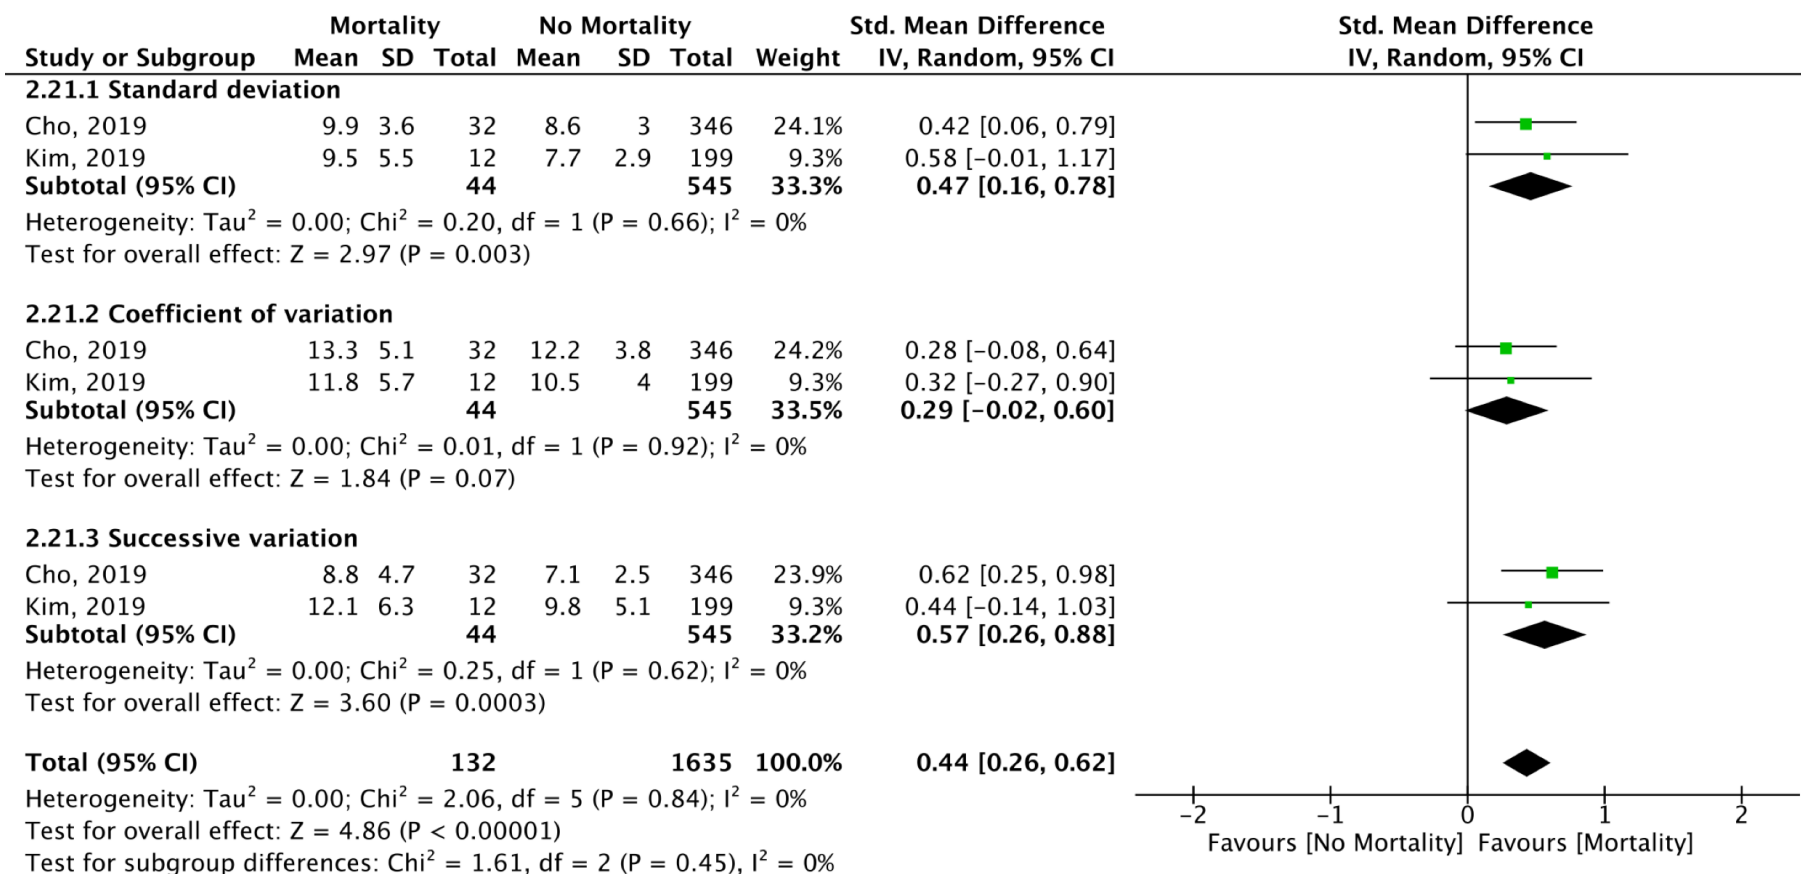

**Figure S21.** Forest plots evaluating the association of post-treatment A) systolic blood pressure variability and B) diastolic blood pressure variability with symptomatic intracranial hemorrhage. mRS, modified Rankin Scale; Std., standardized; SD, standard deviation; IV, Inverse Variance; CI, confidence interval.

A)

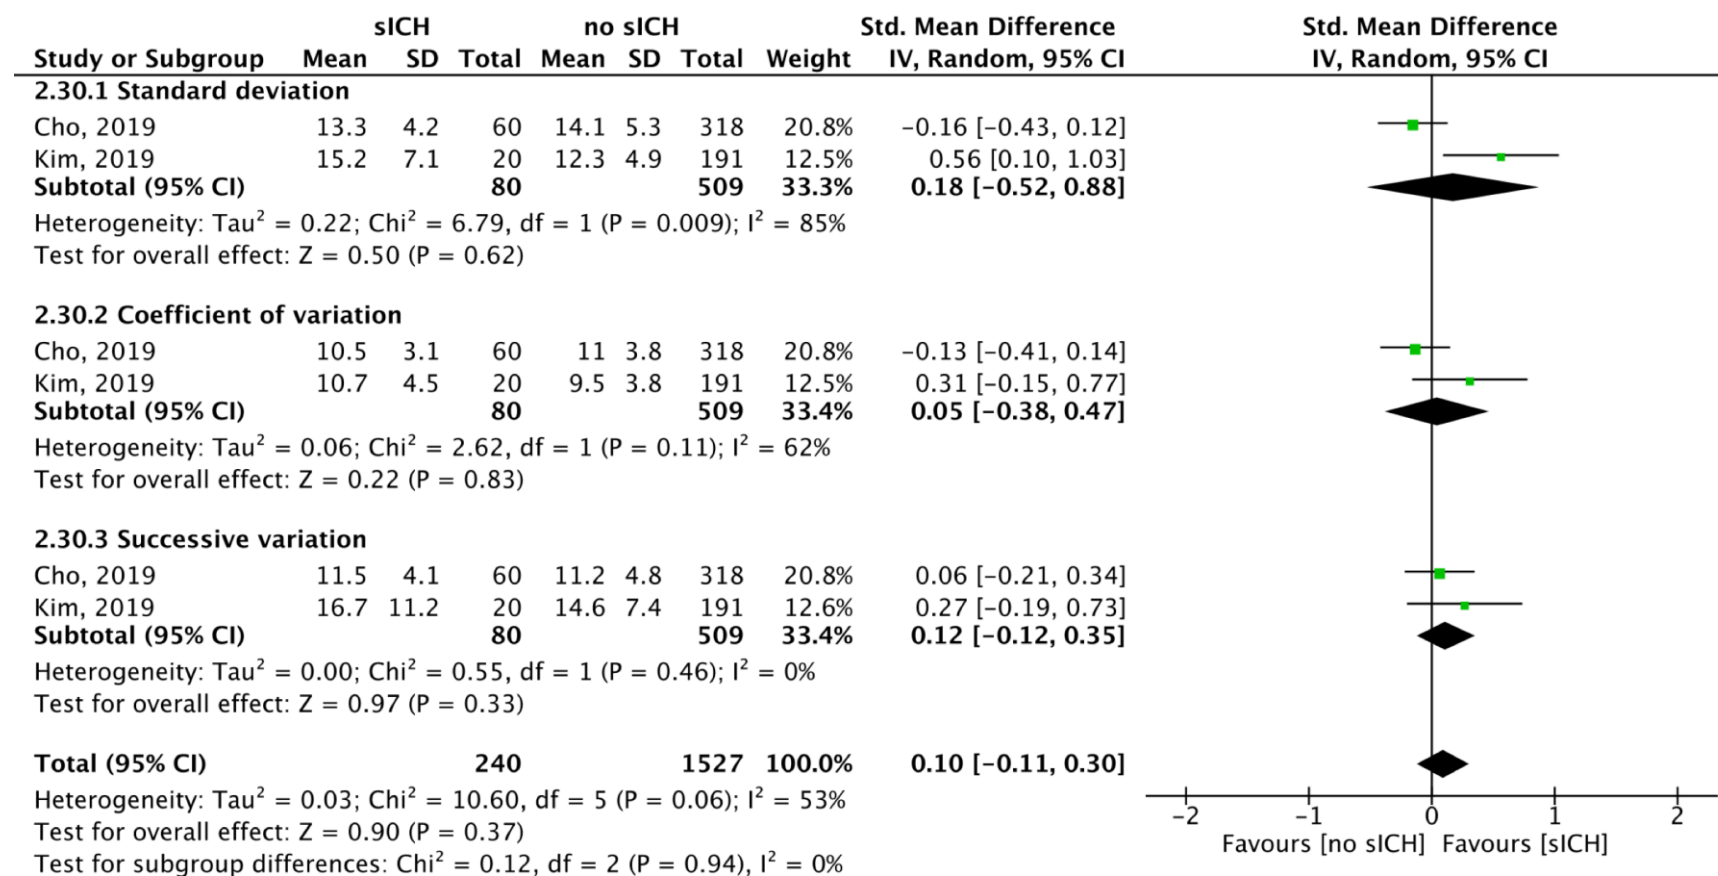

B)

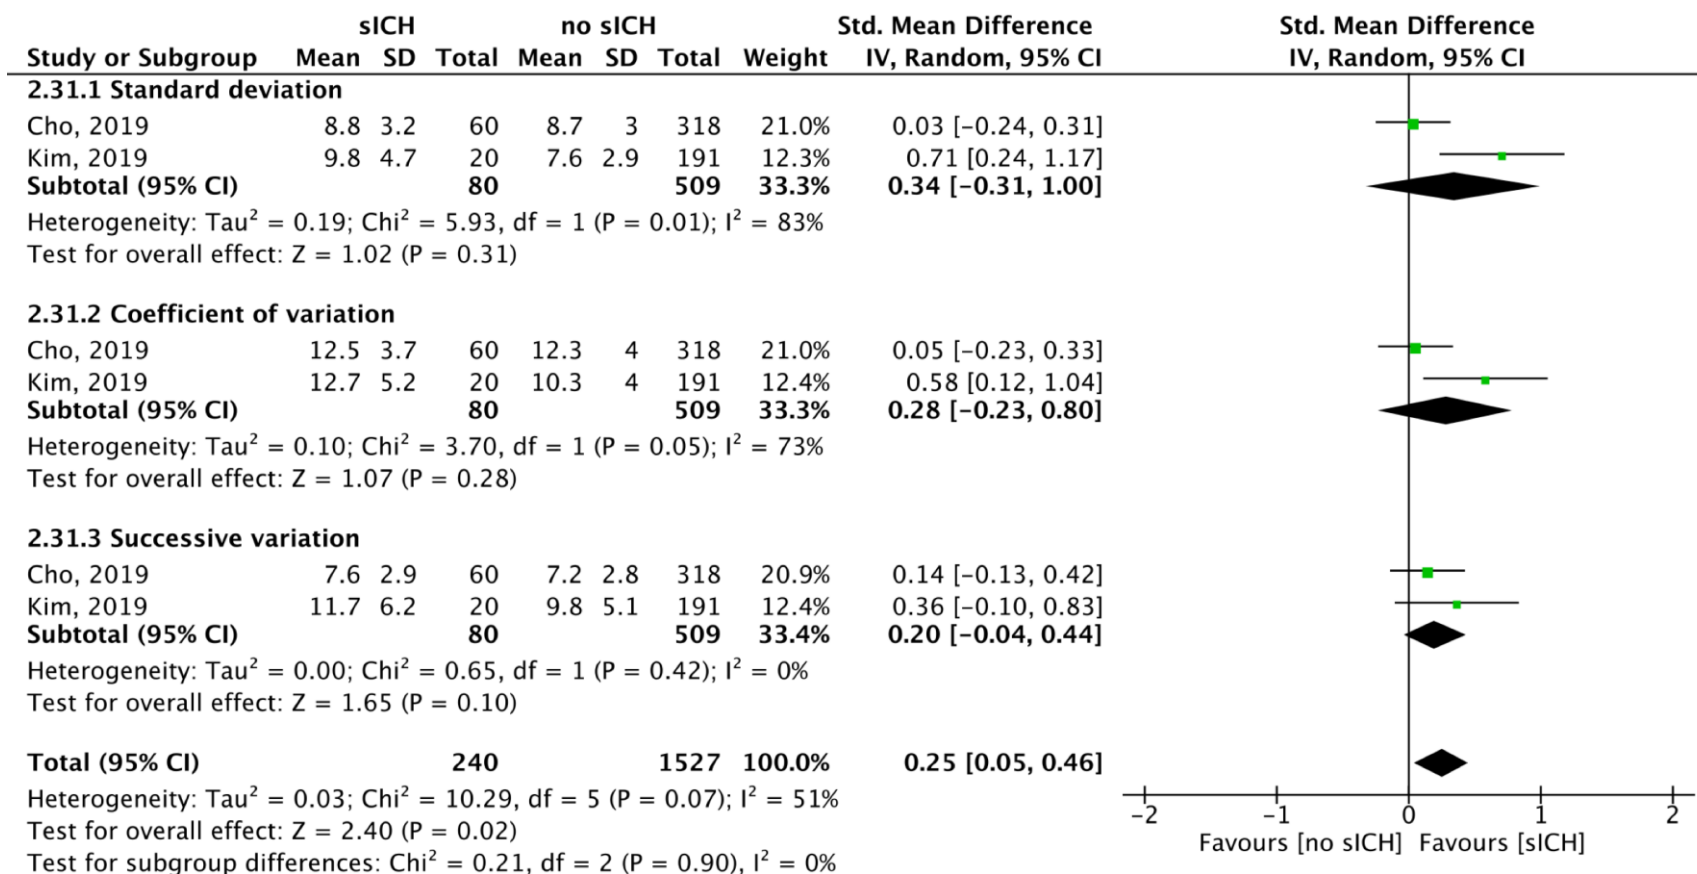

**Figure S22.** Forest plot evaluating the adjusted association of pre-treatment mean systolic blood pressure levels and 3-month functional independence. SE, standard error; MT, Mechanical Thrombectomy; IV, Inverse Variance; CI, confidence interval.

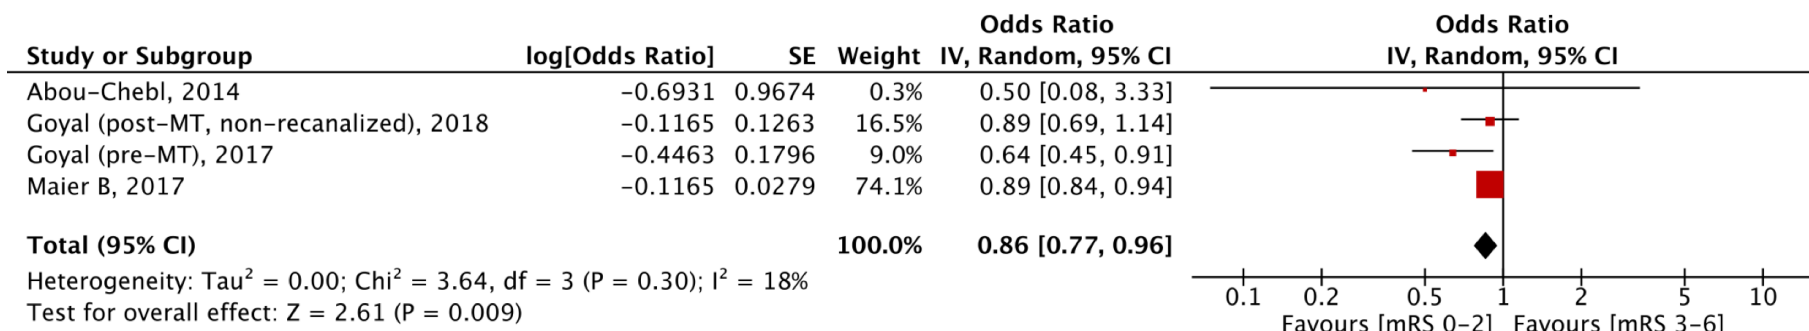

**Figure S23.** Forest plot evaluating the adjusted association of pre-treatment mean A) systolic blood pressure levels and B) diastolic blood pressure levels with 3-month mortality. SE, standard error; MT, Mechanical Thrombectomy; IV, Inverse Variance; CI, confidence interval.

A)

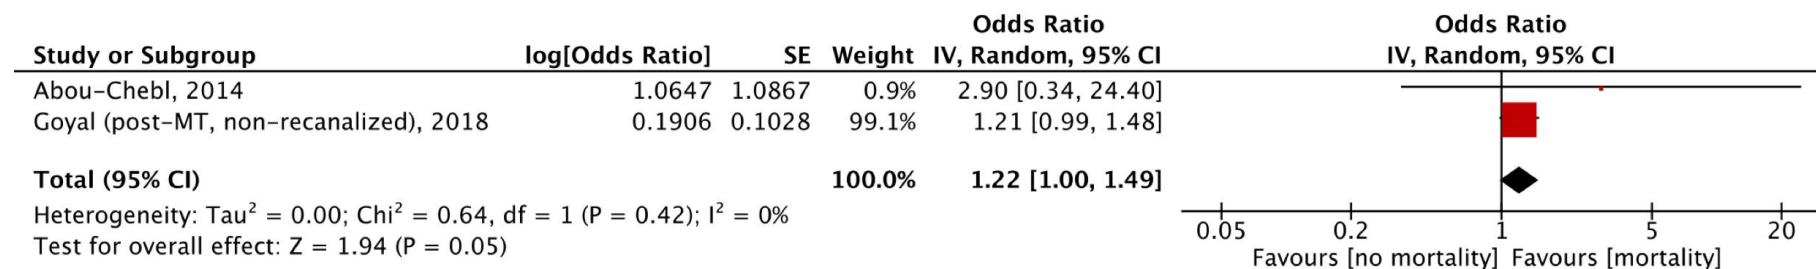

B)

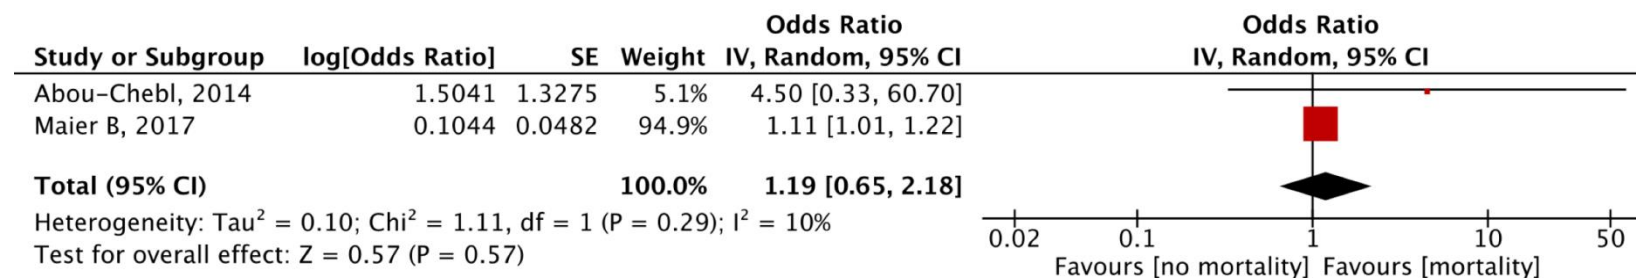

**Figure S24.** Forest plot evaluating the adjusted association of during-treatment maximum systolic blood pressure levels and 3-month functional independence. SE, standard error; IV, Inverse Variance; CI, confidence interval.

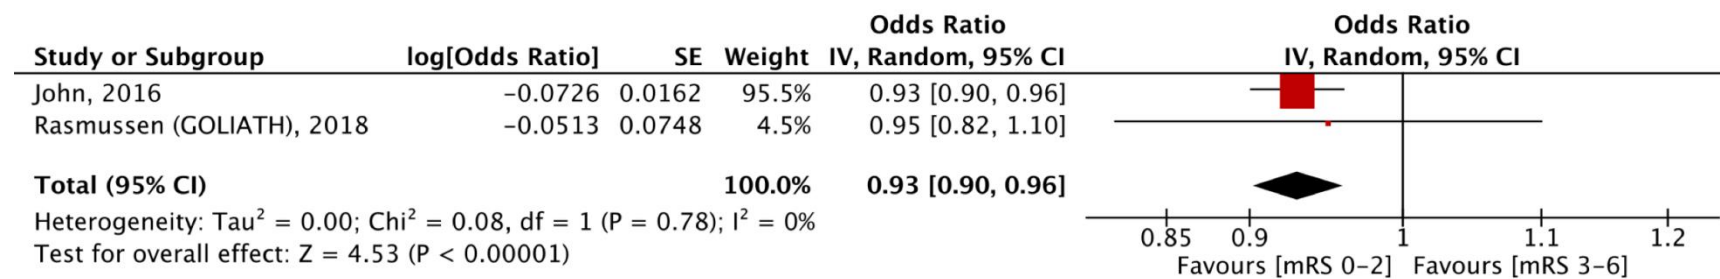

**Figure S25.** Forest plot evaluating the adjusted association of post-treatment maximum A) diastolic blood pressure levels and B) systolic blood pressure levels with 3-month functional independence. SE, standard error; MT, Mechanical Thrombectomy; IV, Inverse Variance; CI, confidence interval.

A)

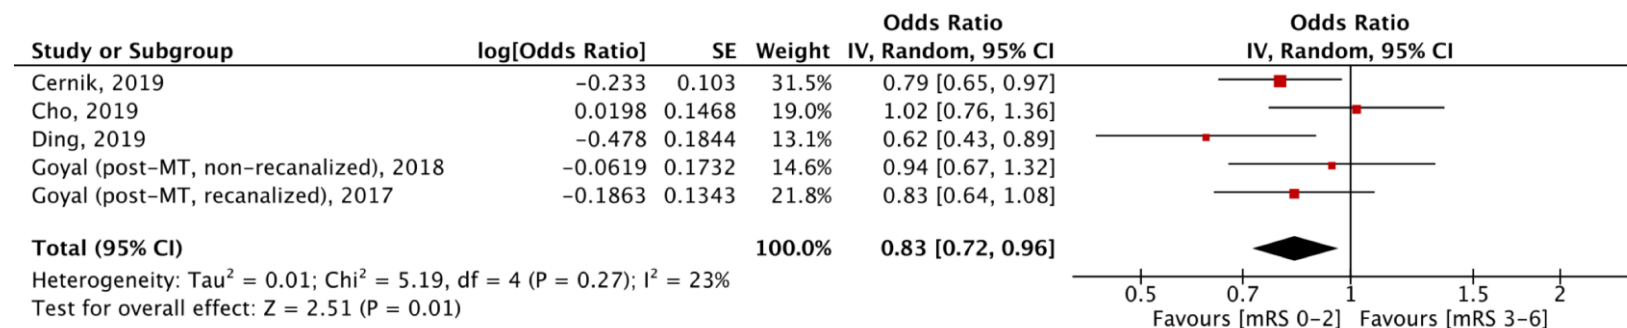

B)

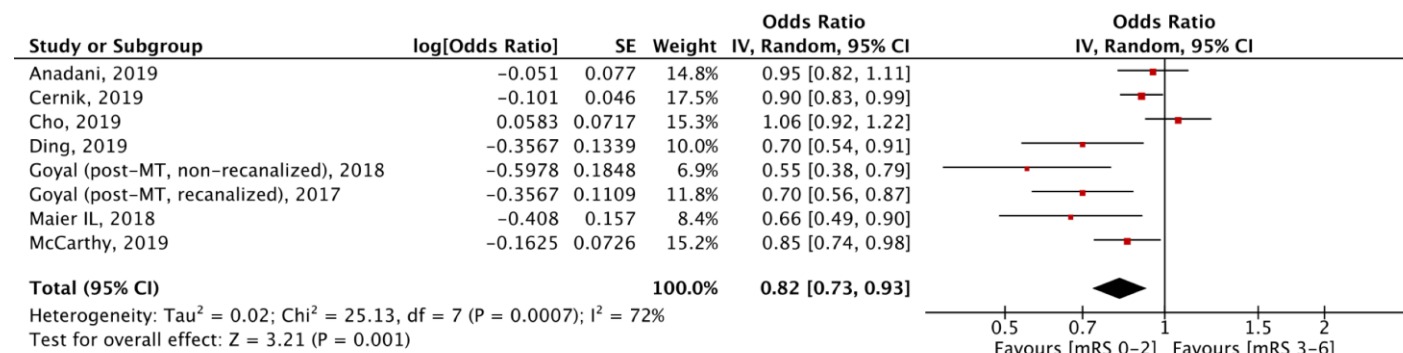

**Figure S26.** Forest plot evaluating the adjusted association of post-treatment A) minimum systolic blood pressure levels and B) mean diastolic blood pressure levels with 3-month functional independence. SE, standard error; MT, Mechanical Thrombectomy; IV, Inverse Variance; CI, confidence interval.

A)

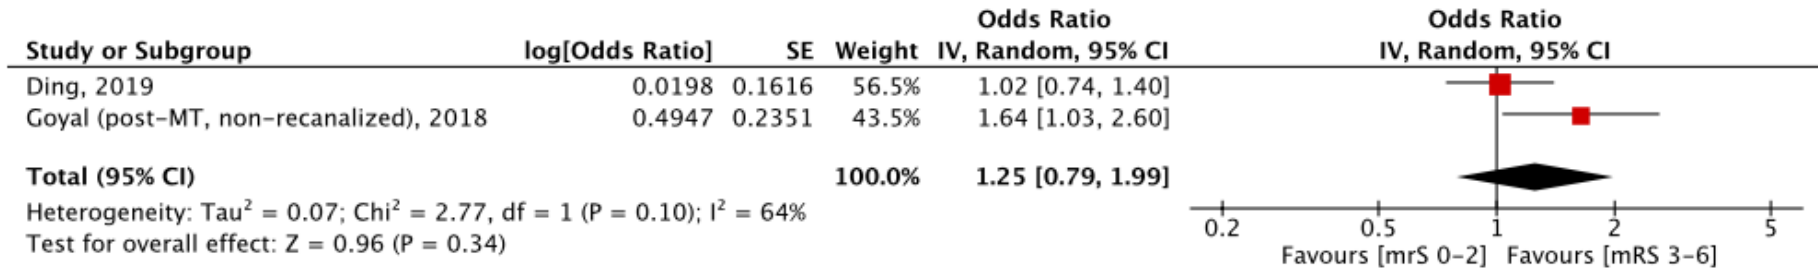

B)

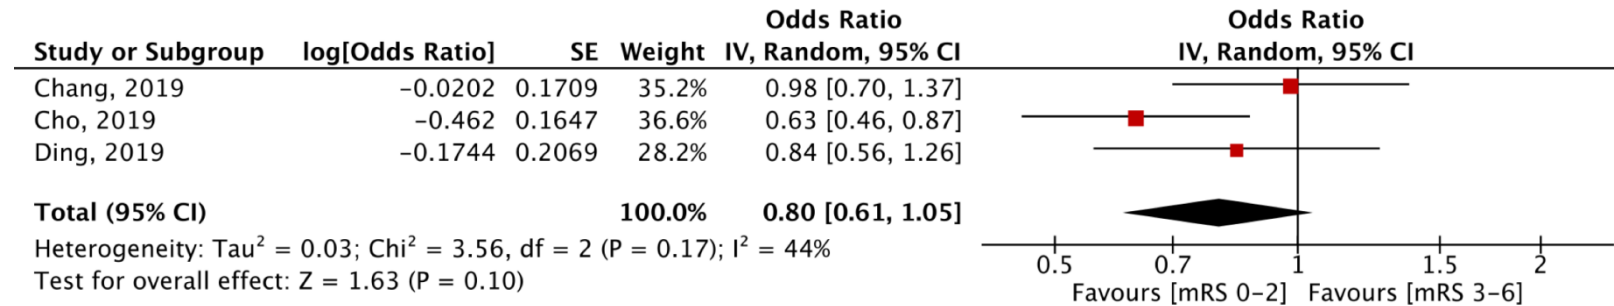



**Figure S27.** Forest plot evaluating the adjusted association of post-treatment A) maximum diastolic blood pressure levels and B) mean systolic blood pressure levels 3-month mortality. SE, standard error; MT, Mechanical Thrombectomy; IV, Inverse Variance; CI, confidence interval.

A)

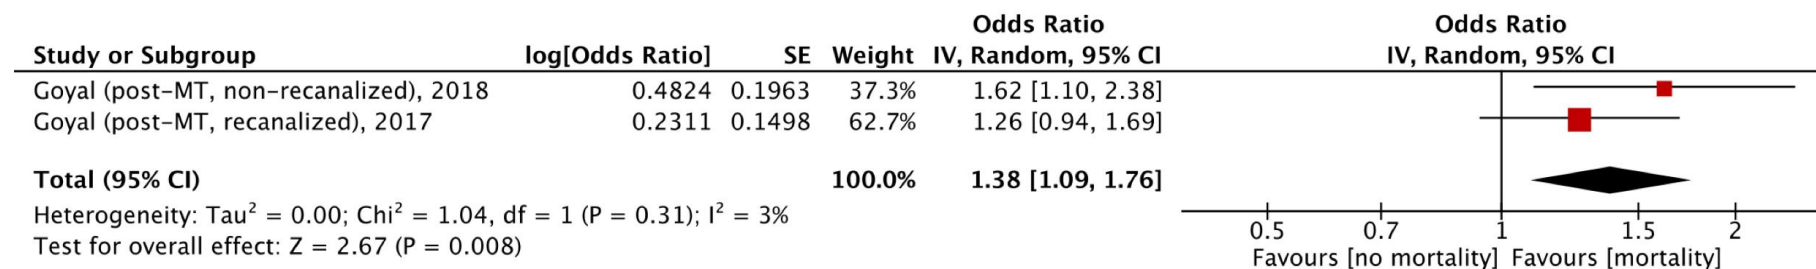

B)

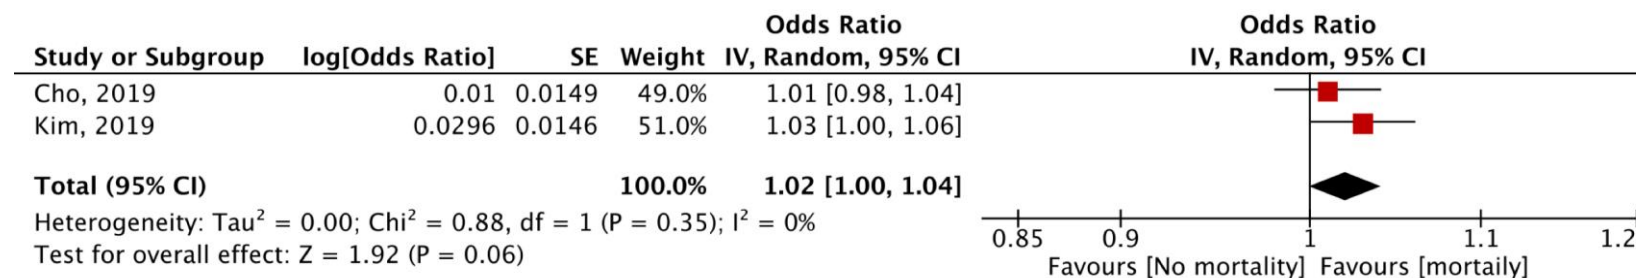

**Figure S28.** Forest plot evaluating the adjusted association of post-treatment A) maximum, B) minimum and C) mean systolic blood pressure levels and symptomatic intracranial hemorrhage. SE, standard error; IV, Inverse Variance; CI, confidence interval.

A)

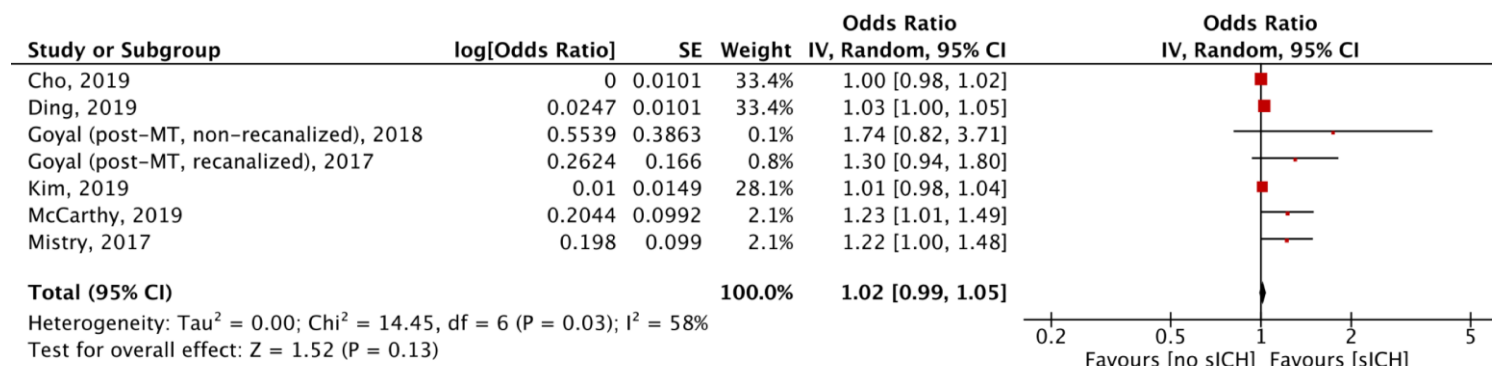

B)

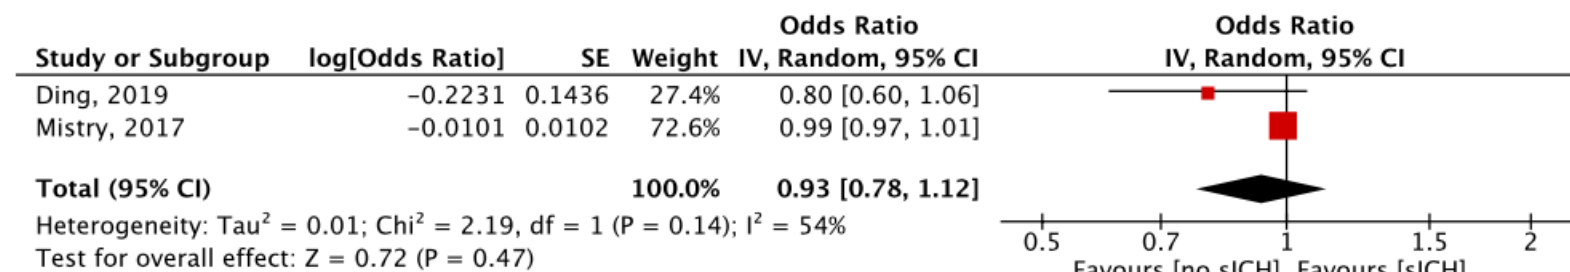

C)

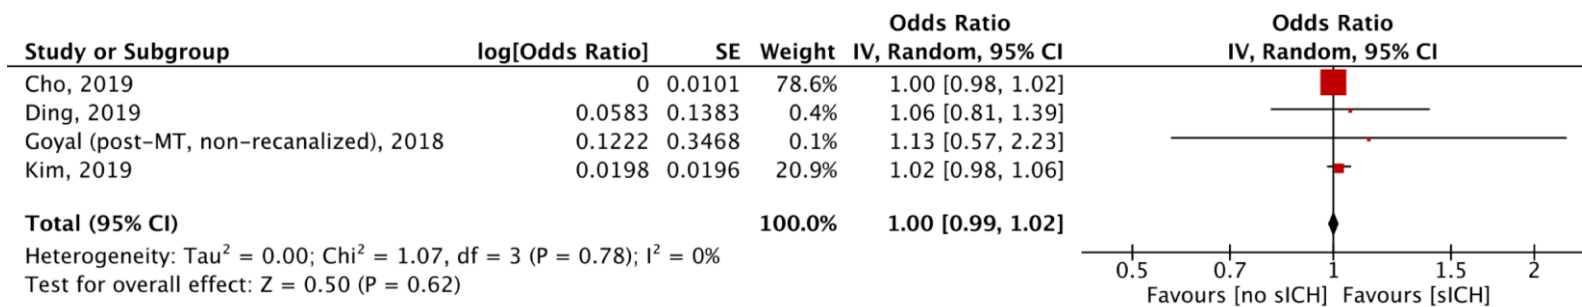

**Figure S29.** Forest plot evaluating the adjusted association of post-treatment A) minimum and B) mean diastolic blood pressure levels and symptomatic intracranial hemorrhage. SE, standard error; IV, Inverse Variance; CI, confidence interval.

A)

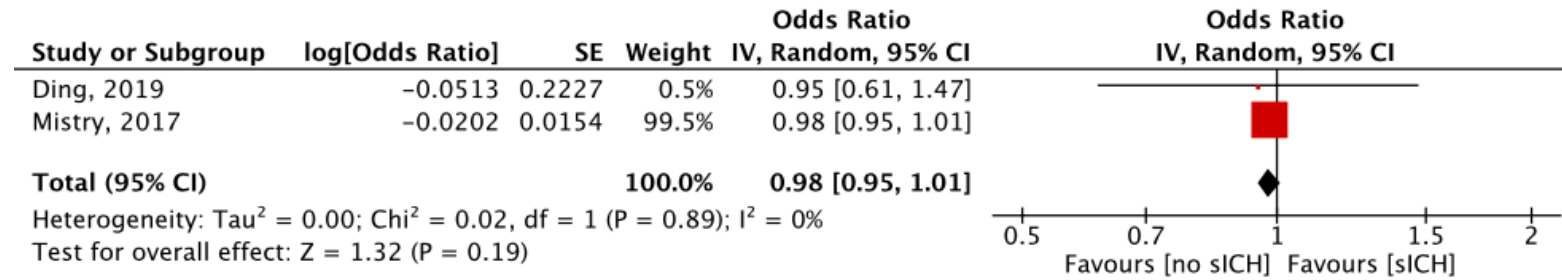

B)

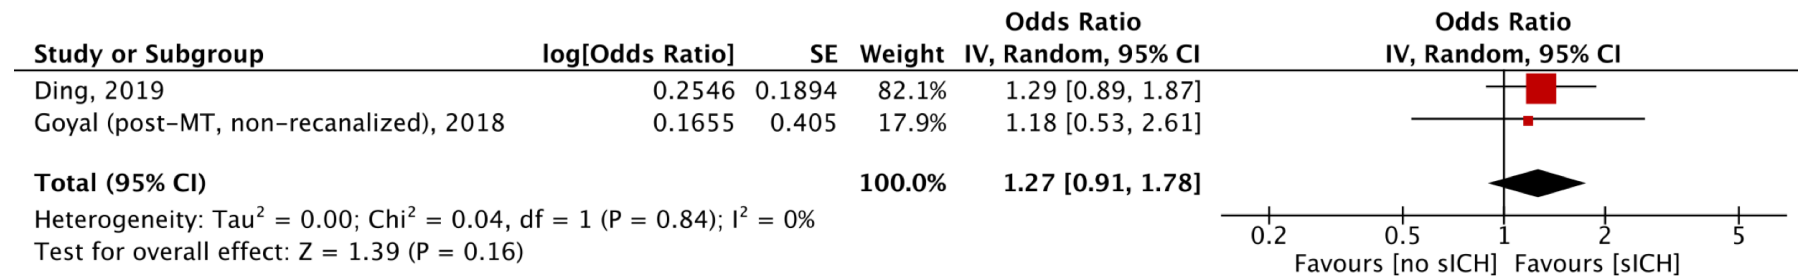

**Figure S30.** Forest plot evaluating the adjusted association of post-treatment A) maximum and B) mean systolic blood pressure levels with 3-month functional deterioration. SE, standard error; MT, Mechanical Thrombectomy; IV, Inverse Variance; CI, confidence interval.

A)

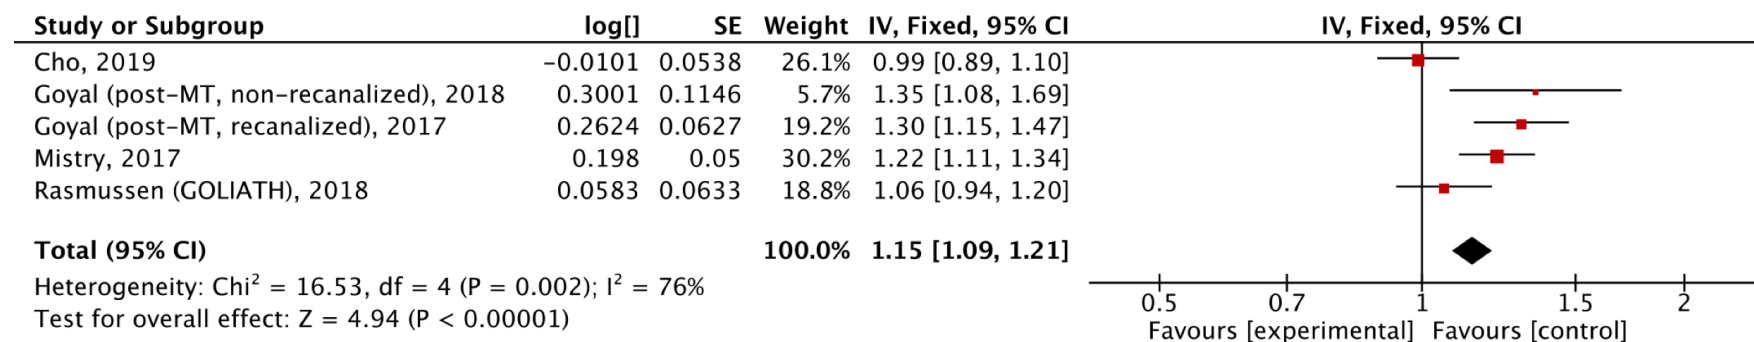

B)

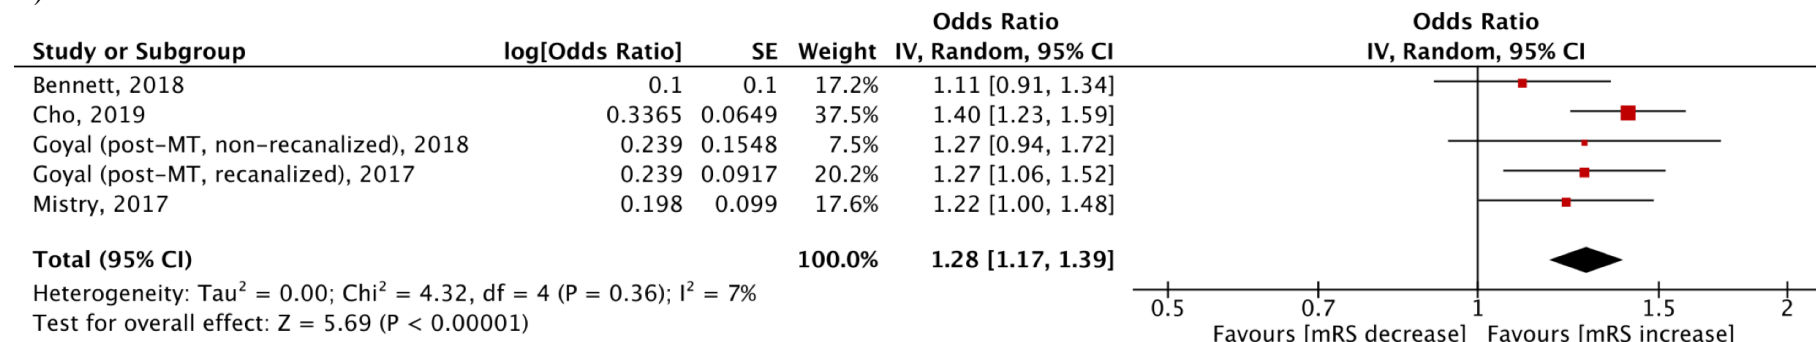

**Figure S31.** Forest plot evaluating the adjusted association of post-treatment A) maximum and B) mean diastolic blood pressure levels with 3-month functional deterioration. SE, standard error; MT, Mechanical Thrombectomy; IV, Inverse Variance; CI, confidence interval.

A)

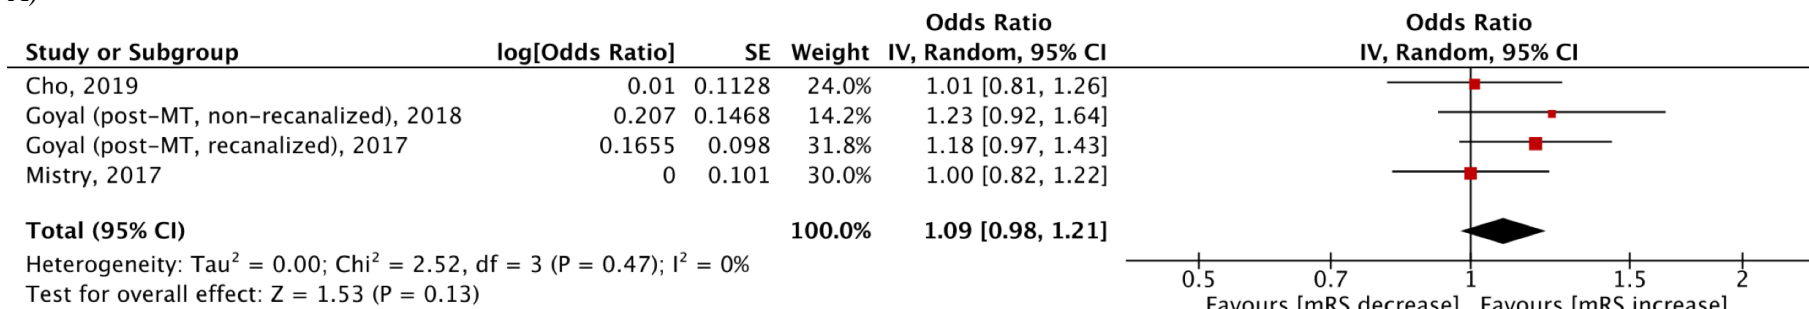

B)

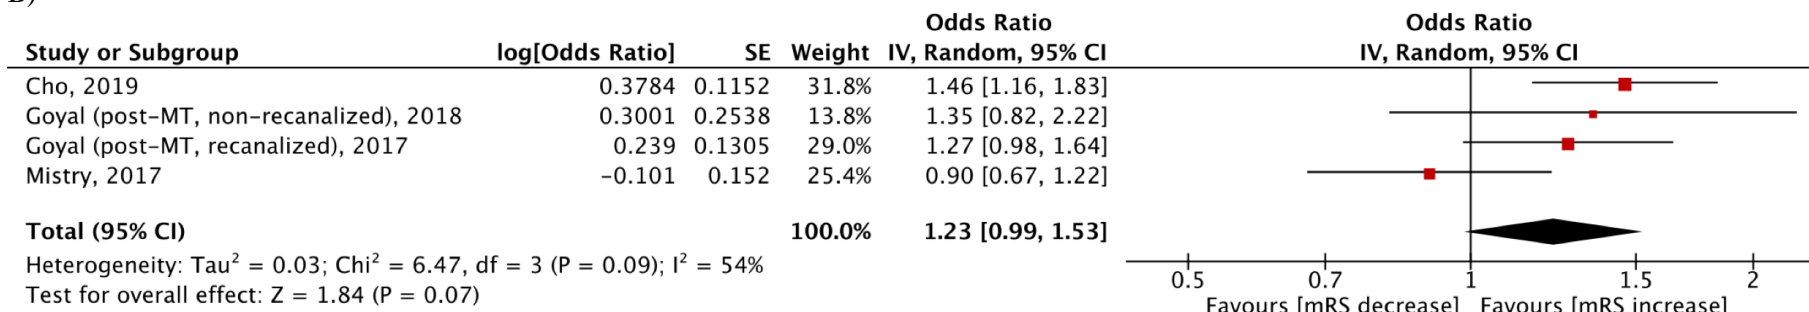

**Figure S32.** Forest plot evaluating the association of post-treatment maximum A) systolic blood pressure levels and B) diastolic blood pressure levels with 3-month functional independence among recanalized patients. SE, standard error; MT, Mechanical Thrombectomy; IV, Inverse Variance; CI, confidence interval.

A)

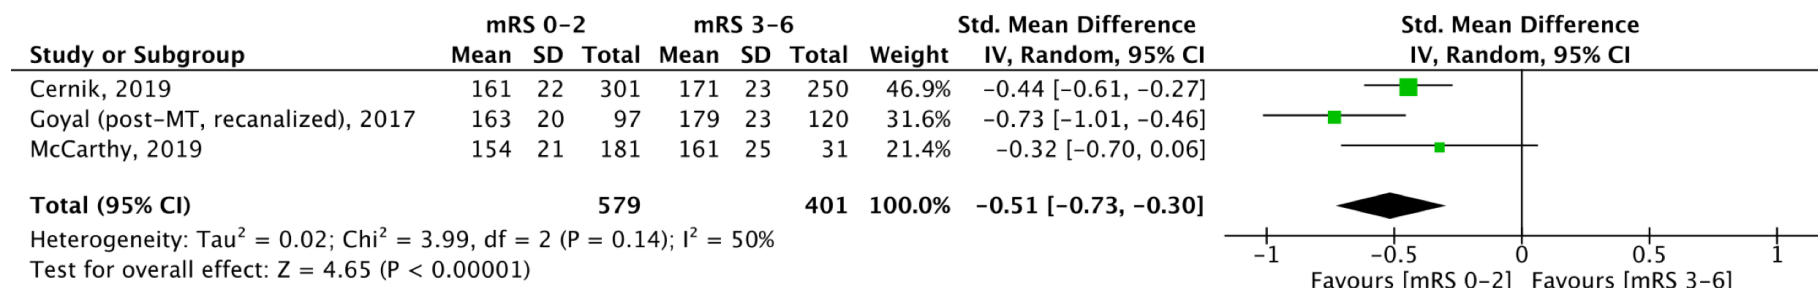

B)

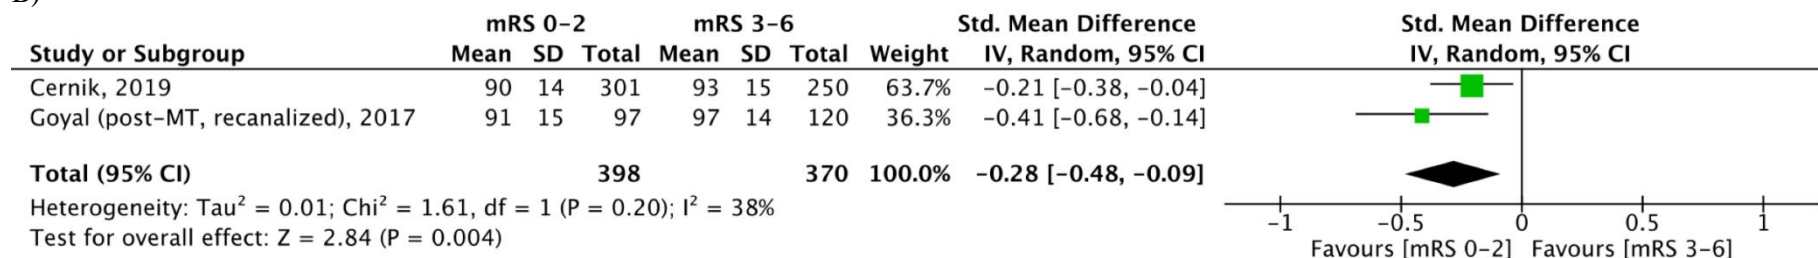

**Figure S33.** Forest plot evaluating the association of post-treatment mean A) systolic blood pressure levels and B) diastolic blood pressure levels with 3-month functional independence among recanalized patients. SE, standard error; MT, Mechanical Thrombectomy; IV, Inverse Variance; CI, confidence interval.

A)

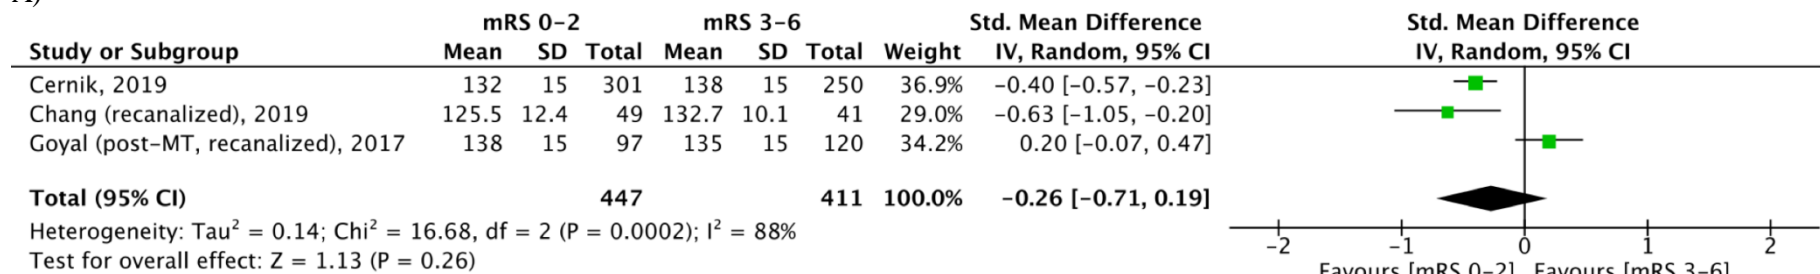

B)

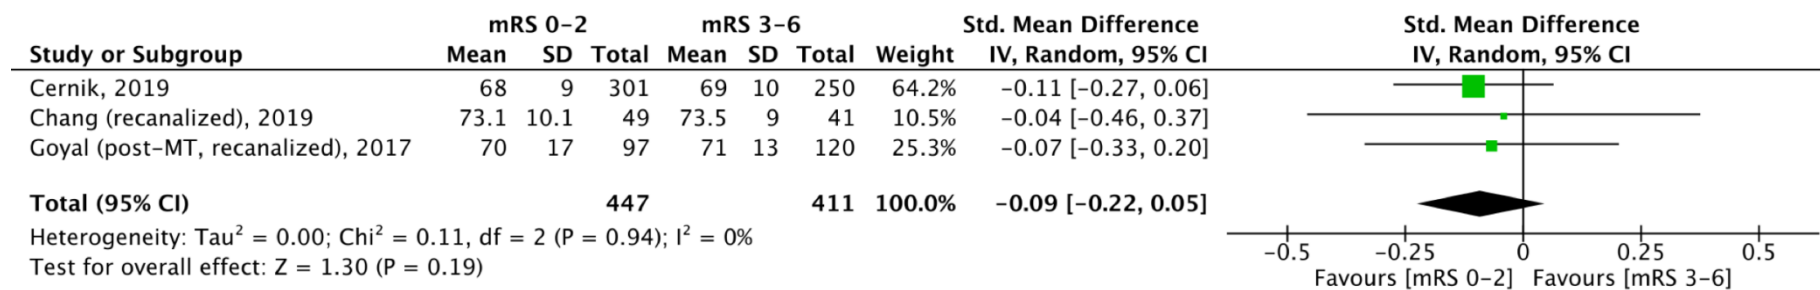



**Figure S34.** Forest plot evaluating the association of post-treatment mean A) systolic blood pressure levels and B) diastolic blood pressure levels with symptomatic intracranial hemorrhage among recanalized patients. SE, standard error; MT, Mechanical Thrombectomy; IV, Inverse Variance; CI, confidence interval.

A)

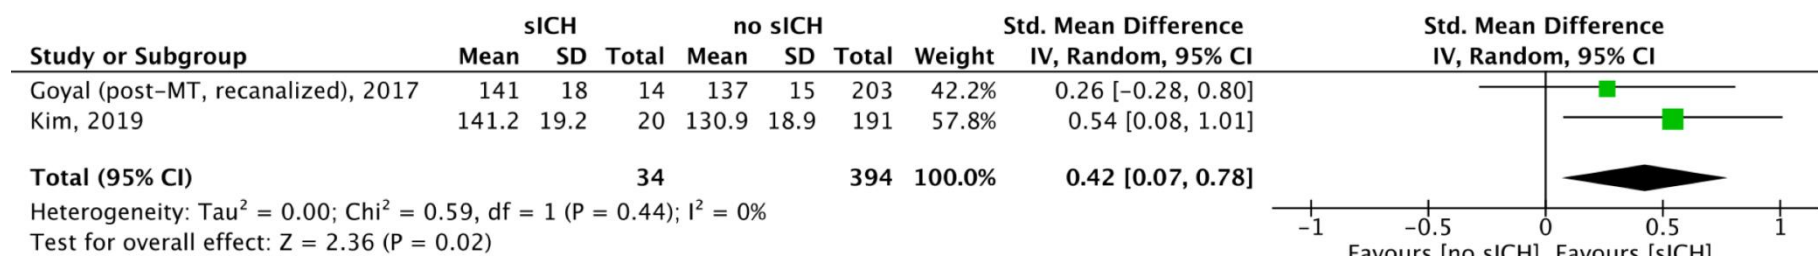

B)

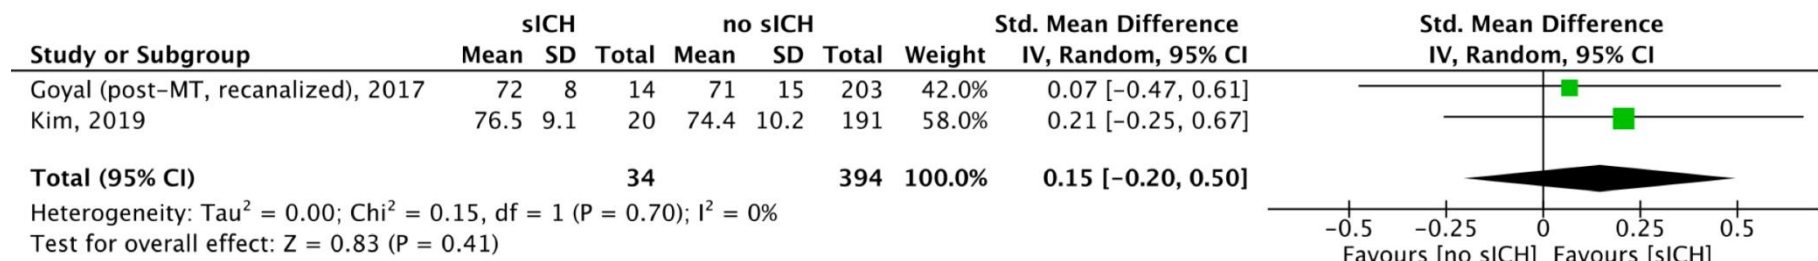

**Figure S35.** Forest plot evaluating the association of post-treatment maximum A) systolic blood pressure levels and B) diastolic blood pressure levels with symptomatic intracranial hemorrhage among recanalized patients. SE, standard error; MT, Mechanical Thrombectomy; IV, Inverse Variance; CI, confidence interval.

A)

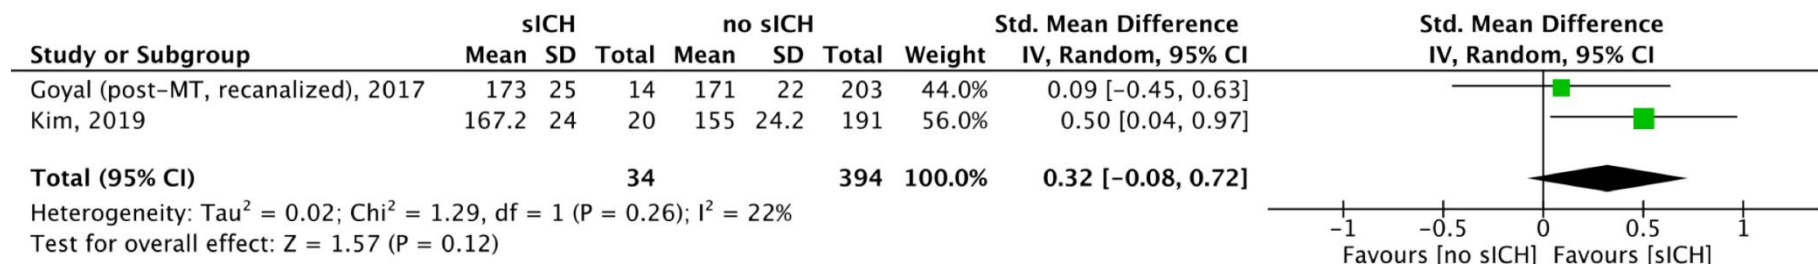

B)

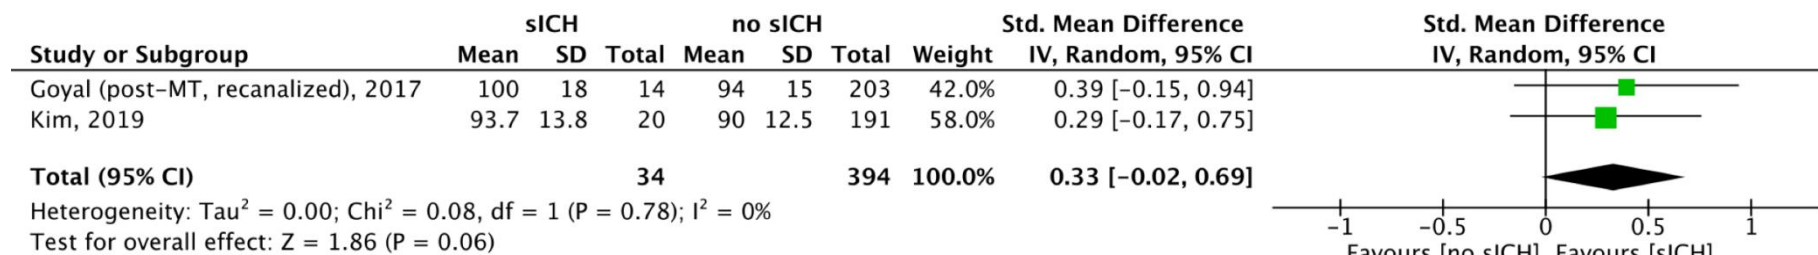

**Figure S36.** Forest plot evaluating the adjusted association of post-treatment A) mean systolic blood pressure levels and B) maximum diastolic blood pressure levels with 3-month functional independence among recanalized patients. SE, standard error; MT, Mechanical Thrombectomy; IV, Inverse Variance; CI, confidence interval.

A)

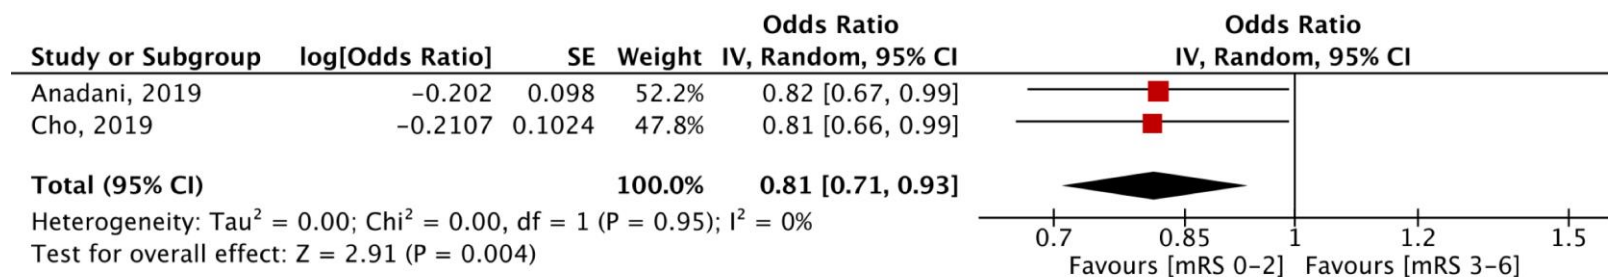

B)

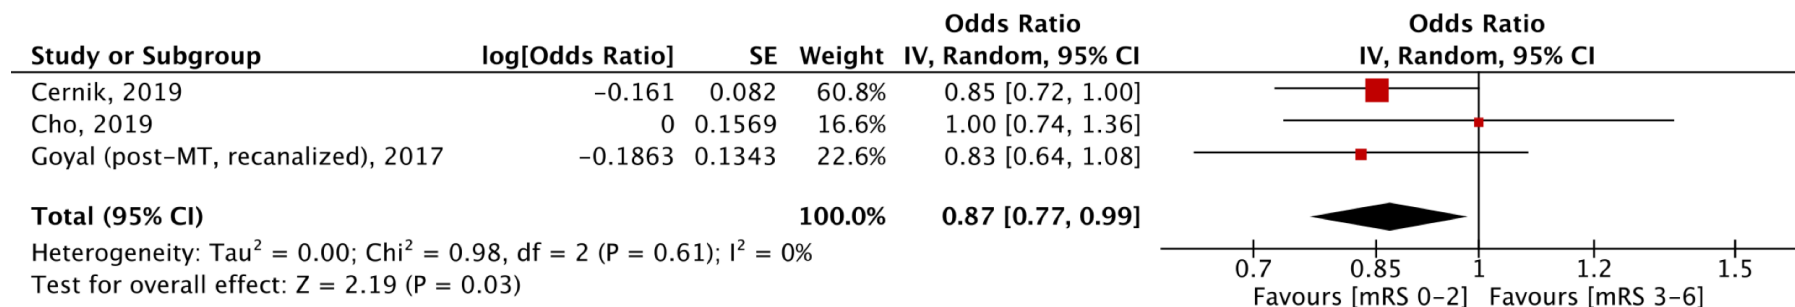

**Figure S37.** Forest plot evaluating the adjusted association of post-treatment maximum systolic blood pressure levels with 3-month functional independence among recanalized patients. SE, standard error; MT, Mechanical Thrombectomy; IV, Inverse Variance; CI, confidence interval.

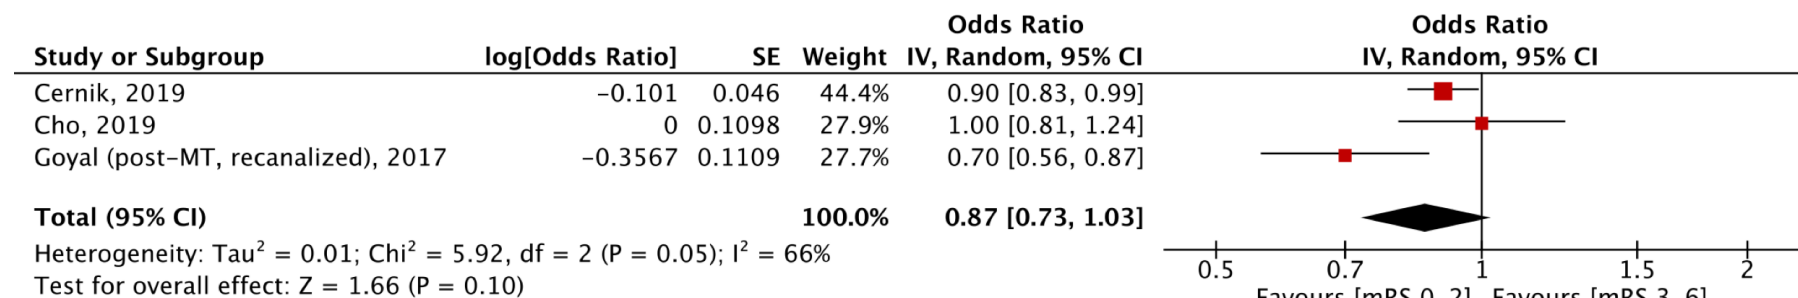

**Figure S38.** Forest plot evaluating the adjusted association of post-treatment maximum systolic blood pressure levels with 3-month mortality among recanalized patients. SE, standard error; MT, Mechanical Thrombectomy; IV, Inverse Variance; CI, confidence interval.

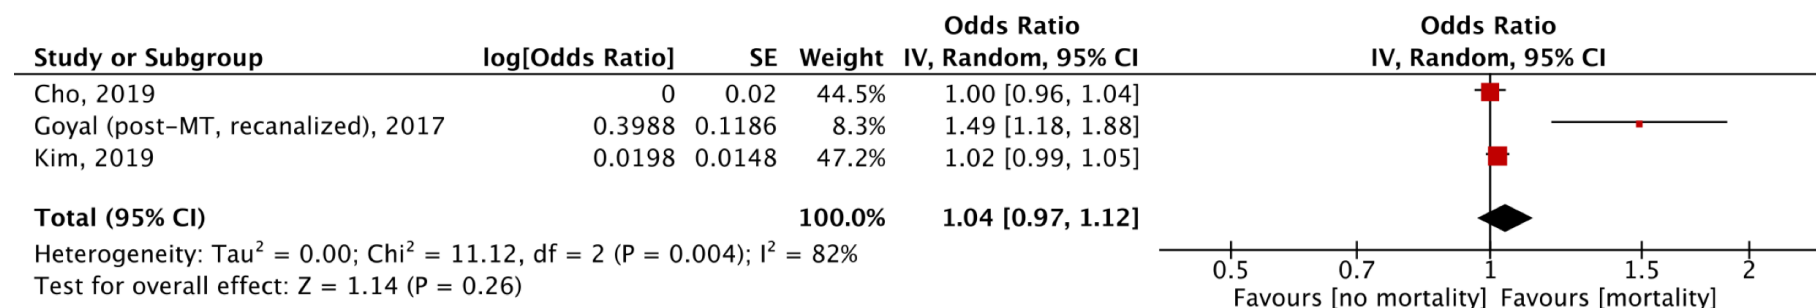

**Figure S39.** Forest plot evaluating the adjusted association of post-treatment A) maximum systolic blood pressure levels and B) mean systolic blood pressure levels with symptomatic intracranial hemorrhage among recanalized patients. SE, standard error; IV, Inverse Variance; CI, confidence interval.

A)

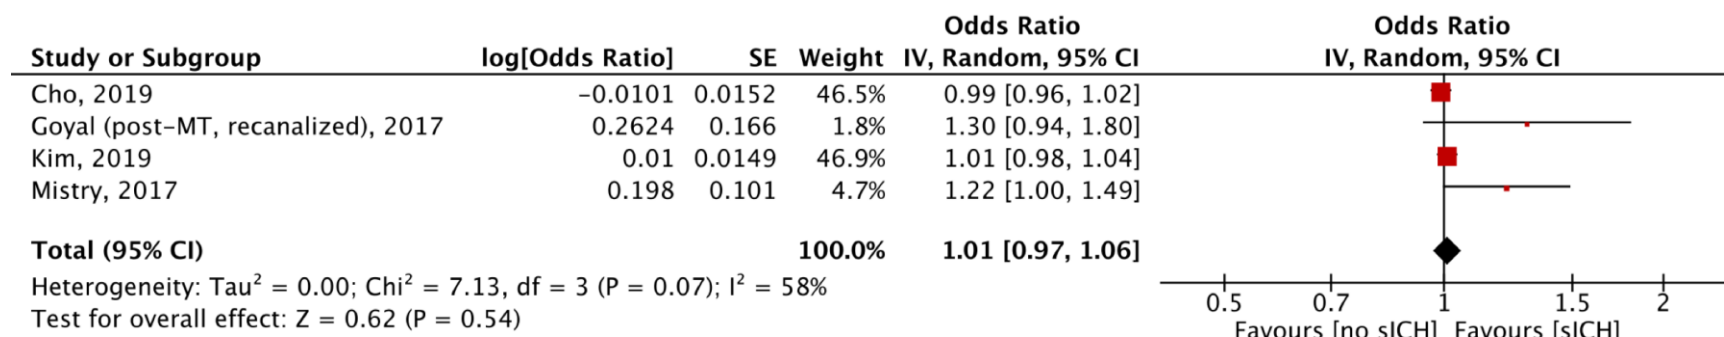

B)

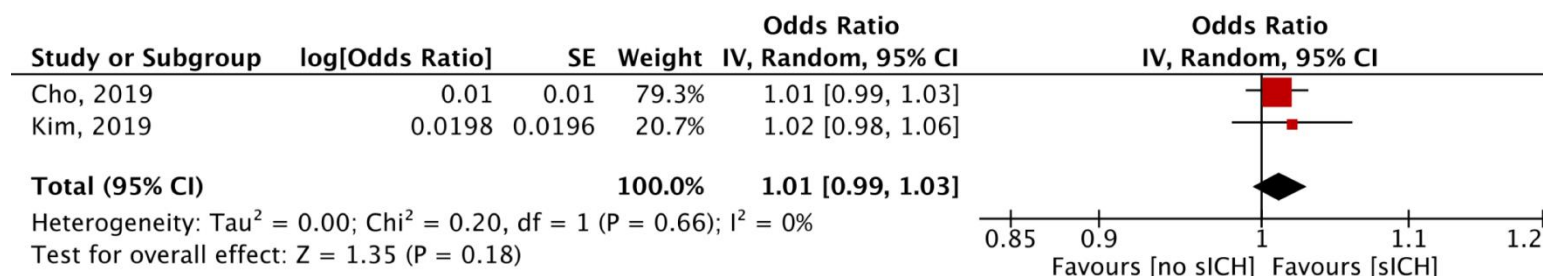

**Figure S40.** Funnel plot of the included studies evaluating the unadjusted associations of pre-treatment mean blood pressure variables with functional independence. SE, standard error; SMD, standardized mean difference; SBP, systolic blood pressure; DBP, diastolic blood pressure.

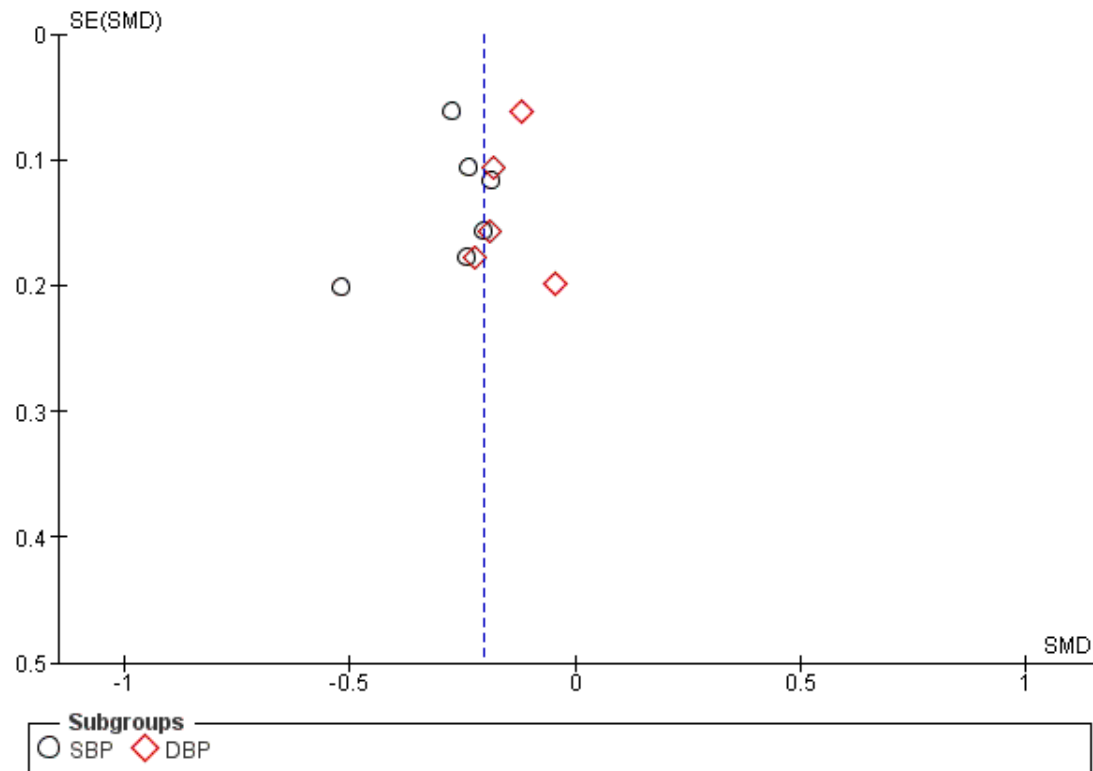

**Figure S41.** Funnel plot of the included studies evaluating the unadjusted association of post-treatment maximum blood pressure variables with functional independence. SE, standard error; SMD, standardized mean difference; SBP, systolic blood pressure; DBP, diastolic blood pressure.

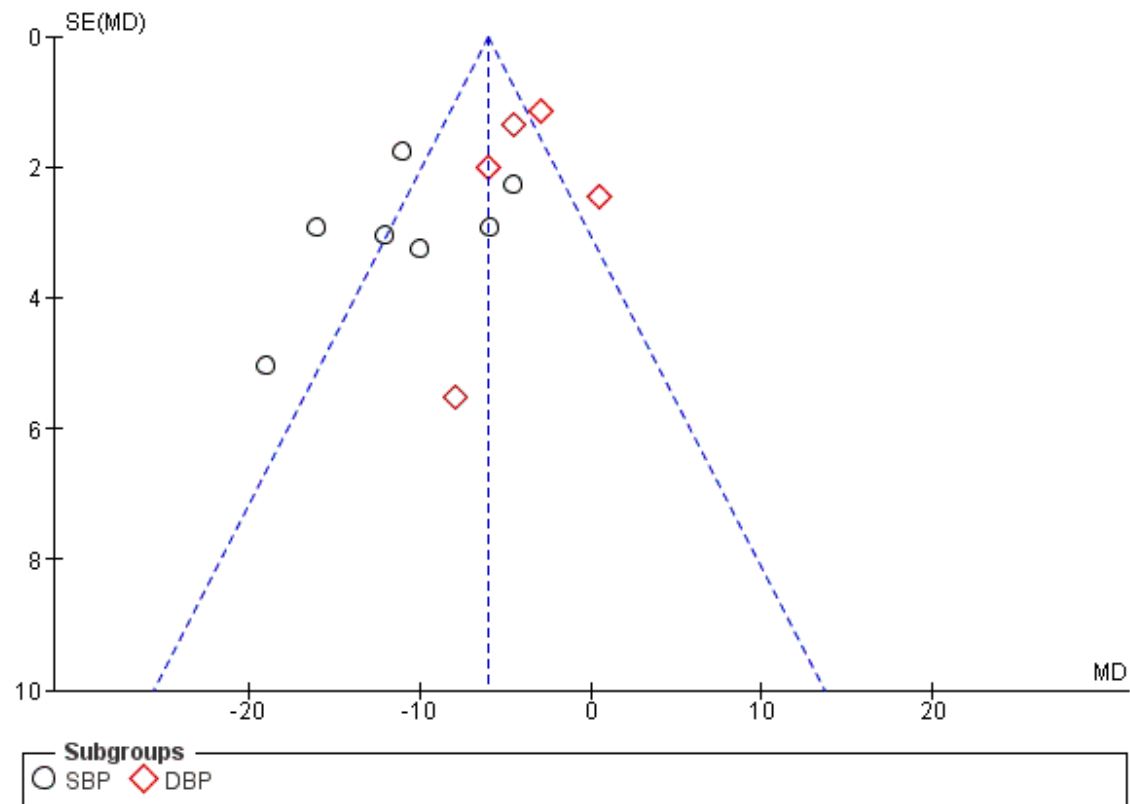

**Figure S42.** Funnel plot of the included studies evaluating the adjusted association of post-treatment maximum blood pressure variables with functional independence. SE, standard error; OR, odds ratio; SBP, systolic blood pressure; DBP, diastolic blood pressure.

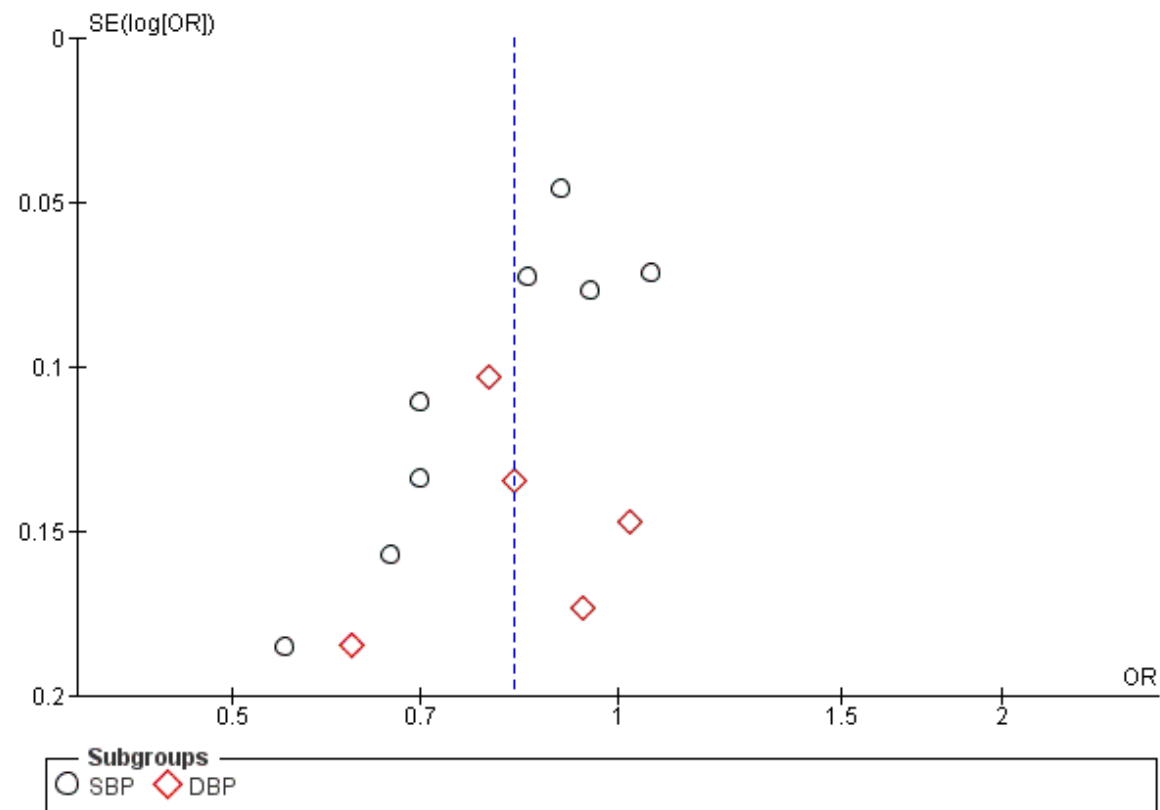

Supplement: NIHMS1579279-supplement-Supplementary_Material.pdf [file NIHMS1579279-supplement-Supplementary_Material.pdf]
